# Supplementary material for: Molecular Epidemiology Surveillance of SARS-Cov-2: Mutations and Genetic Diversity One Year After Emerging
Source: Preprints.org preprint supplement (doi:10.20944/preprints202101.0173.v1), 2021-01-11
Supplement: Supplementary file 1 [file supplementary]

## Sheet: Hoja1
Accession number	Database	Region	Country	Collection date
MT044257	NCBI	North America	USA	2020-01-28
MN997409	NCBI	North America	USA	2020-01-22
MT027062	NCBI	North America	USA	2020-01-29
MT159710	NCBI	North America	USA	2020-02-17
MT184912	NCBI	North America	USA	2020-02-17
MT598633	NCBI	North America	USA	2020-02-20
MT476384	NCBI	North America	USA	2020-02-21
MT163718	NCBI	North America	USA	2020-02-29
MT304484	NCBI	North America	USA	2020-02-29
MT276323	NCBI	North America	USA	2020-02-28
MT627276	NCBI	North America	USA	2020-02-27
MT627286	NCBI	North America	USA	2020-02-28
MT627293	NCBI	North America	USA	2020-02-29
MT627307	NCBI	North America	USA	2020-02-29
MT627315	NCBI	North America	USA	2020-02-29
MT632567	NCBI	North America	USA	2020-02-28
MT632612	NCBI	North America	USA	2020-02-29
MT419829	NCBI	North America	USA	2020-02-28
MT419830	NCBI	North America	USA	2020-02-27
MT370904	NCBI	North America	USA	2020-02-29
MT276324	NCBI	North America	USA	2020-02-26
MT276325	NCBI	North America	USA	2020-02-27
MT276326	NCBI	North America	USA	2020-02-29
MT276327	NCBI	North America	USA	2020-02-29
MT276328	NCBI	North America	USA	2020-02-27
MT276329	NCBI	North America	USA	2020-02-28
MT159708	NCBI	North America	USA	2020-02-17
MT159711	NCBI	North America	USA	2020-02-20
MT159716	NCBI	North America	USA	2020-02-24
MT159717	NCBI	North America	USA	2020-02-17
MT159718	NCBI	North America	USA	2020-02-18
MT118835	NCBI	North America	USA	2020-02-23
MT106052	NCBI	North America	USA	2020-02-06
MT106053	NCBI	North America	USA	2020-02-10
MT106054	NCBI	North America	USA	2020-02-11
MT358693	NCBI	North America	USA	2020-03-25
MT539163	NCBI	North America	USA	2020-03-10
MT539162	NCBI	North America	USA	2020-03-13
MT304481	NCBI	North America	USA	2020-03-04
MT304480	NCBI	North America	USA	2020-03-03
MT344945	NCBI	North America	USA	2020-03-07
MT325570	NCBI	North America	USA	2020-03-05
MT325607	NCBI	North America	USA	2020-03-07
MT325597	NCBI	North America	USA	2020-03-09
MT344946	NCBI	North America	USA	2020/03
MT334529	NCBI	North America	USA	2020-03-10
MT325592	NCBI	North America	USA	2020-03-05
MT325593	NCBI	North America	USA	2020-03-07
MT263404	NCBI	North America	USA	2020-03-24
MT304487	NCBI	North America	USA	2020-03-01
MT370957	NCBI	North America	USA	2020-03-18
MT419842	NCBI	North America	USA	2020-03-04
MT344961	NCBI	North America	USA	2020-03-07
MT344962	NCBI	North America	USA	2020-03-07
MT304482	NCBI	North America	USA	2020-03-01
MT188339	NCBI	North America	USA	2020-03-09
MT461605	NCBI	North America	USA	2020-03-28
MT334538	NCBI	North America	USA	2020-03-13
MT598642	NCBI	North America	USA	2020-03-03
MT605816	NCBI	North America	USA	2020-03-05
MT325568	NCBI	North America	USA	2020-03-06
MT344954	NCBI	North America	USA	2020-03-05
MT605815	NCBI	North America	USA	2020-03-08
MT339039	NCBI	North America	USA	2020-03-17
MT325578	NCBI	North America	USA	2020-03-07
MT325561	NCBI	North America	USA	2020-03-09
MT252689	NCBI	North America	USA	2020-03-10
MT605817	NCBI	North America	USA	2020-03-07
MT472623	NCBI	North America	USA	2020-03-05
MT325591	NCBI	North America	USA	2020-03-06
MT252782	NCBI	North America	USA	2020-03-11
MT345817	NCBI	North America	USA	2020-03-24
MT434809	NCBI	North America	USA	2020-03-19
MT370837	NCBI	North America	USA	2020-03-18
MT358651	NCBI	North America	USA	2020-03-30
MT598171	NCBI	North America	USA	2020-03-21
MT325564	NCBI	North America	USA	2020-03-06
MT345870	NCBI	North America	USA	2020-03-30
MT506885	NCBI	North America	USA	2020-03-16
MT461625	NCBI	North America	USA	2020-03-30
MT345858	NCBI	North America	USA	2020-03-23
MT358646	NCBI	North America	USA	2020-03-31
MT412249	NCBI	North America	USA	2020-03-12
MT259258	NCBI	North America	USA	2020-03-13
MT412297	NCBI	North America	USA	2020-03-30
MT375431	NCBI	North America	USA	2020-03-29
MT370931	NCBI	North America	USA	2020-03-21
MT304485	NCBI	North America	USA	2020-03-02
MT325595	NCBI	North America	USA	2020-03-06
MT258378	NCBI	North America	USA	2020-03-18
MT461628	NCBI	North America	USA	2020-03-30
MT358652	NCBI	North America	USA	2020-03-30
MT344960	NCBI	North America	USA	2020-03-09
MT422807	NCBI	North America	USA	2020-03-27
MT459988	NCBI	North America	USA	2020-03-27
MT459990	NCBI	North America	USA	2020-03-26
MT350237	NCBI	North America	USA	2020/03
MT259248	NCBI	North America	USA	2020-03-14
MT520498	NCBI	North America	USA	2020-03-22
MT339041	NCBI	North America	USA	2020-03-17
MT499200	NCBI	North America	USA	2020-03-17
MT452574	NCBI	North America	USA	2020-03-12
MT325627	NCBI	North America	USA	2020-03-04
MT304486	NCBI	North America	USA	2020-03-02
MT325605	NCBI	North America	USA	2020-03-05
MT325598	NCBI	North America	USA	2020-03-08
MT293201	NCBI	North America	USA	2020-03-19
MT461624	NCBI	North America	USA	2020-03-30
MT358661	NCBI	North America	USA	2020-03-31
MT345878	NCBI	North America	USA	2020-03-29
MT370933	NCBI	North America	USA	2020-03-20
MT325588	NCBI	North America	USA	2020-03-06
MT322421	NCBI	North America	USA	2020/03
MT412307	NCBI	North America	USA	2020-03-29
MT263411	NCBI	North America	USA	2020-03-14
MT415903	NCBI	North America	USA	2020/03
MT520220	NCBI	North America	USA	2020-03-24
MT344950	NCBI	North America	USA	2020-03-07
MT344951	NCBI	North America	USA	2020-03-08
MT325580	NCBI	North America	USA	2020-03-06
MT325590	NCBI	North America	USA	2020-03-07
MT325582	NCBI	North America	USA	2020-03-05
MT325600	NCBI	North America	USA	2020-03-05
MT325622	NCBI	North America	USA	2020-03-04
MT344957	NCBI	North America	USA	2020-03-07
MT304490	NCBI	North America	USA	2020-03-01
MT325577	NCBI	North America	USA	2020-03-07
MT325587	NCBI	North America	USA	2020-03-04
MT344956	NCBI	North America	USA	2020-03-07
MT344958	NCBI	North America	USA	2020-03-07
MT344955	NCBI	North America	USA	2020-03-08
MT325603	NCBI	North America	USA	2020-03-09
MT472621	NCBI	North America	USA	2020-03-08
MT304488	NCBI	North America	USA	2020-03-01
MT344948	NCBI	North America	USA	2020-03-05
MT325594	NCBI	North America	USA	2020-03-06
MT472626	NCBI	North America	USA	2020-03-07
MT325615	NCBI	North America	USA	2020-03-07
MT192765	NCBI	North America	USA	2020-03-11
MT477835	NCBI	North America	USA	2020-03-15
MT466583	NCBI	North America	USA	2020-03-15
MT325576	NCBI	North America	USA	2020-03-08
MT325620	NCBI	North America	USA	2020-03-08
MT472627	NCBI	North America	USA	2020-03-08
MT308703	NCBI	North America	USA	2020/04
MT481936	NCBI	North America	USA	2020-04-07
MT385452	NCBI	North America	USA	2020-04-03
MT446358	NCBI	North America	USA	2020-04-06
MT536178	NCBI	North America	USA	2020-04-06
MT536183	NCBI	North America	USA	2020-04-07
MT412264	NCBI	North America	USA	2020-04-07
MT609568	NCBI	North America	USA	2020/04
MT609600	NCBI	North America	USA	2020/04
MT609558	NCBI	North America	USA	2020/04
MT474138	NCBI	North America	USA	2020-04-12
MT609581	NCBI	North America	USA	2020/04
MT482115	NCBI	North America	USA	2020/04
MT536176	NCBI	North America	USA	2020-04-06
MT536177	NCBI	North America	USA	2020-04-07
MT536190	NCBI	North America	USA	2020-04-06
MT536181	NCBI	North America	USA	2020-04-08
MT446346	NCBI	North America	USA	2020-04-07
MT412284	NCBI	North America	USA	2020-04-04
MT482149	NCBI	North America	USA	2020/04
MT506894	NCBI	North America	USA	2020-04-17
MT461632	NCBI	North America	USA	2020-04-02
MT558647	NCBI	North America	USA	2020/04
MT375470	NCBI	North America	USA	2020-04-06
MT461668	NCBI	North America	USA	2020-04-02
MT450876	NCBI	North America	USA	2020/04
MT429186	NCBI	North America	USA	2020-04-12
MT477857	NCBI	North America	USA	2020-04-07
MT418888	NCBI	North America	USA	2020/04
MT432195	NCBI	North America	USA	2020-04-09
MT506886	NCBI	North America	USA	2020-04-18
MT300186	NCBI	North America	USA	2020-04-02
MT520173	NCBI	North America	USA	2020-04-01
MT477904	NCBI	North America	USA	2020-04-29
MT365033	NCBI	North America	USA	2020-04-02
MT506907	NCBI	North America	USA	2020-04-14
MT584997	NCBI	North America	USA	2020-04-26
MT350257	NCBI	North America	USA	2020/04
MT506890	NCBI	North America	USA	2020-04-14
MT477861	NCBI	North America	USA	2020-04-12
MT506891	NCBI	North America	USA	2020-04-18
MT506887	NCBI	North America	USA	2020-04-15
MT375474	NCBI	North America	USA	2020-04-06
MT598178	NCBI	North America	USA	2020-05-08
MT958206	NCBI	North America	USA	2020-05-21
MT951929	NCBI	North America	USA	2020/05
MT873073	NCBI	North America	USA	2020-05-06
MT873269	NCBI	North America	USA	2020-05-01
MT856684	NCBI	North America	USA	2020-05-04
MT846634	NCBI	North America	USA	2020-05-15
MT846637	NCBI	North America	USA	2020-05-13
MT843318	NCBI	North America	USA	2020-05-28
MT834343	NCBI	North America	USA	2020-05-29
MT827227	NCBI	North America	USA	2020-05-26
MT821795	NCBI	North America	USA	2020-05-11
MT820130	NCBI	North America	USA	2020-05-05
MT810087	NCBI	North America	USA	2020-05-19
MT810705	NCBI	North America	USA	2020-05-01
MT810873	NCBI	North America	USA	2020-05-19
MT811755	NCBI	North America	USA	2020-05-14
MT806763	NCBI	North America	USA	2020-05-01
MT797761	NCBI	North America	USA	2020-05-18
MT778829	NCBI	North America	USA	2020-05-04
MT772535	NCBI	North America	USA	2020-05-22
MT679187	NCBI	North America	USA	2020/05
MT981423	NCBI	North America	USA	2020-06-19
MT981424	NCBI	North America	USA	2020-06-19
MT981425	NCBI	North America	USA	2020-06-19
MT981426	NCBI	North America	USA	2020-06-19
MT981435	NCBI	North America	USA	2020-06-19
MT893664	NCBI	North America	USA	2020-06-20
MT897460	NCBI	North America	USA	2020-06-22
MT897462	NCBI	North America	USA	2020-06-24
MT897464	NCBI	North America	USA	2020-06-21
MT890321	NCBI	North America	USA	2020-06-22
MT892969	NCBI	North America	USA	2020-06-26
MT892970	NCBI	North America	USA	2020-06-25
MT892972	NCBI	North America	USA	2020-06-26
MT846503	NCBI	North America	USA	2020-06-18
MT831201	NCBI	North America	USA	2020-06-08
MT831410	NCBI	North America	USA	2020-06-09
MT831842	NCBI	North America	USA	2020-06-15
MT831846	NCBI	North America	USA	2020-06-20
MW130860	NCBI	North America	USA	2020-07-15
MW067744	NCBI	North America	USA	2020/07
MW067745	NCBI	North America	USA	2020/07
MW067816	NCBI	North America	USA	2020-07-10
MW070048	NCBI	North America	USA	2020-07-07
MT981090	NCBI	North America	USA	2020/07
MT981101	NCBI	North America	USA	2020/07
MT981107	NCBI	North America	USA	2020/07
MT966076	NCBI	North America	USA	2020-07-07
MT966086	NCBI	North America	USA	2020-07-08
MT966101	NCBI	North America	USA	2020-07-29
MT966104	NCBI	North America	USA	2020-07-29
MT966156	NCBI	North America	USA	2020-07-01
MT966161	NCBI	North America	USA	2020-07-02
MT966167	NCBI	North America	USA	2020-07-02
MT966191	NCBI	North America	USA	2020-07-10
MT966195	NCBI	North America	USA	2020-07-13
MT966212	NCBI	North America	USA	2020-07-17
MT966217	NCBI	North America	USA	2020-07-16
MT966230	NCBI	North America	USA	2020-07-17
MT966233	NCBI	North America	USA	2020-07-20
MT966256	NCBI	North America	USA	2020-07-31
MT925981	NCBI	North America	USA	2020/07
MT925991	NCBI	North America	USA	2020/07
MT890346	NCBI	North America	USA	2020-07-06
MT890347	NCBI	North America	USA	2020-07-06
MT890356	NCBI	North America	USA	2020-07-14
MT890358	NCBI	North America	USA	2020-07-14
MT892983	NCBI	North America	USA	2020-07-06
MT875360	NCBI	North America	USA	2020-07-22
MT846413	NCBI	North America	USA	2020-07-16
MT846483	NCBI	North America	USA	2020-07-14
MT846492	NCBI	North America	USA	2020-07-16
MT846554	NCBI	North America	USA	2020-07-06
MT846557	NCBI	North America	USA	2020-07-09
MT846598	NCBI	North America	USA	2020-07-10
MT846602	NCBI	North America	USA	2020-07-10
MT846603	NCBI	North America	USA	2020-07-12
MT846655	NCBI	North America	USA	2020-07-06
MW134361	NCBI	North America	USA	2020-08-12
MW134404	NCBI	North America	USA	2020-08-05
MW134406	NCBI	North America	USA	2020-08-12
MW075782	NCBI	North America	USA	2020-08-26
MW075795	NCBI	North America	USA	2020-08-25
MW075797	NCBI	North America	USA	2020-08-20
MW075801	NCBI	North America	USA	2020-08-25
MW067707	NCBI	North America	USA	2020/08
MW067715	NCBI	North America	USA	2020/08
MW067720	NCBI	North America	USA	2020/08
MW067781	NCBI	North America	USA	2020/08
MW070081	NCBI	North America	USA	2020-08-31
MW040621	NCBI	North America	USA	2020-08-05
MW040622	NCBI	North America	USA	2020-08-05
MW040631	NCBI	North America	USA	2020-08-31
MW035378	NCBI	North America	USA	2020-08-10
MW035380	NCBI	North America	USA	2020-08-05
MW035382	NCBI	North America	USA	2020-08-05
MW035389	NCBI	North America	USA	2020-08-20
MW035429	NCBI	North America	USA	2020-08-23
MW023478	NCBI	North America	USA	2020-08-27
MW023486	NCBI	North America	USA	2020-08-28
MW023494	NCBI	North America	USA	2020-08-25
MT997689	NCBI	North America	USA	2020-08-17
MT997691	NCBI	North America	USA	2020-08-18
MT993876	NCBI	North America	USA	2020/08
MT966254	NCBI	North America	USA	2020-08-01
MT956713	NCBI	North America	USA	2020-08-03
MT956723	NCBI	North America	USA	2020-08-05
MT956724	NCBI	North America	USA	2020-08-07
MT956726	NCBI	North America	USA	2020-08-07
MT956744	NCBI	North America	USA	2020-08-15
MW130877	NCBI	North America	USA	2020-09-12
MW130879	NCBI	North America	USA	2020-09-19
MW086904	NCBI	North America	USA	2020-09-16
MW086906	NCBI	North America	USA	2020-09-16
MW086916	NCBI	North America	USA	2020-09-16
MW077480	NCBI	North America	USA	2020-09-16
MW077489	NCBI	North America	USA	2020-09-16
MW075732	NCBI	North America	USA	2020-09-03
MW075747	NCBI	North America	USA	2020-09-03
MW070086	NCBI	North America	USA	2020-09-01
MW070088	NCBI	North America	USA	2020-09-01
MW070103	NCBI	North America	USA	2020-09-01
MW070107	NCBI	North America	USA	2020-09-01
MW056124	NCBI	North America	USA	2020-09-14
MW056126	NCBI	North America	USA	2020-09-14
MW049012	NCBI	North America	USA	2020-09-15
MW049021	NCBI	North America	USA	2020-09-18
MW040653	NCBI	North America	USA	2020-09-08
MW035532	NCBI	North America	USA	2020-09-06
MW035536	NCBI	North America	USA	2020-09-05
MW030998	NCBI	North America	USA	2020-09-11
MW031049	NCBI	North America	USA	2020-09-16
MW031051	NCBI	North America	USA	2020-09-14
MW031054	NCBI	North America	USA	2020-09-16
MW031063	NCBI	North America	USA	2020-09-14
MW031068	NCBI	North America	USA	2020-09-14
MW031092	NCBI	North America	USA	2020-09-14
MT252754	NCBI	North America	USA	1905-07-12
MT252813	NCBI	North America	USA	1905-07-12
MT252814	NCBI	North America	USA	1905-07-12
MT252820	NCBI	North America	USA	1905-07-12
MW244004	NCBI	North America	USA	2020-10-17
MW244011	NCBI	North America	USA	2020-10-19
MW244015	NCBI	North America	USA	2020-10-19
MW246593	NCBI	North America	USA	2020-10-13
MW246597	NCBI	North America	USA	2020-10-24
MW246600	NCBI	North America	USA	2020-10-25
MW246607	NCBI	North America	USA	2020-10-25
MW246617	NCBI	North America	USA	2020-10-27
MW246622	NCBI	North America	USA	2020-10-28
MW246628	NCBI	North America	USA	2020-10-29
MW240724	NCBI	North America	USA	2020-10-13
MW240729	NCBI	North America	USA	2020-10-13
MW240737	NCBI	North America	USA	2020-10-13
MW240740	NCBI	North America	USA	2020-10-13
MW240747	NCBI	North America	USA	2020-10-13
MW240758	NCBI	North America	USA	2020-10-13
MW241178	NCBI	North America	USA	2020-10-01
MW217313	NCBI	North America	USA	2020/10
MW217319	NCBI	North America	USA	2020/10
MW217324	NCBI	North America	USA	2020/10
MW206450	NCBI	North America	USA	2020-10-02
MW206455	NCBI	North America	USA	2020-10-04
MW210939	NCBI	North America	USA	2020/10
MW210942	NCBI	North America	USA	2020/10
MW202183	NCBI	North America	USA	2020-10-09
MW202192	NCBI	North America	USA	2020-10-14
MW202194	NCBI	North America	USA	2020-10-16
MW202203	NCBI	North America	USA	2020-10-18
MW202221	NCBI	North America	USA	2020-10-23
MW192101	NCBI	North America	USA	2020-10-11
MW192106	NCBI	North America	USA	2020-10-12
MW192123	NCBI	North America	USA	2020-10-02
MW181579	NCBI	North America	USA	2020-10-01
MW181589	NCBI	North America	USA	2020-10-05
MW181593	NCBI	North America	USA	2020-10-05
MW173453	NCBI	North America	USA	2020-10-04
MW173459	NCBI	North America	USA	2020-10-05
EPI_ISL_412972	GISAID	Latin America	Mexico	2020-02-27
EPI_ISL_452139	GISAID	Latin America	Mexico	2020-02-28
EPI_ISL_424626	GISAID	Latin America	Mexico	2020-03-15
EPI_ISL_424667	GISAID	Latin America	Mexico	2020-03-04
EPI_ISL_424670	GISAID	Latin America	Mexico	2020-03-10
EPI_ISL_424672	GISAID	Latin America	Mexico	2020-03-11
EPI_ISL_426363	GISAID	Latin America	Mexico	2020-03-12
EPI_ISL_426364	GISAID	Latin America	Mexico	2020-03-12
EPI_ISL_455436	GISAID	Latin America	Mexico	2020-03-12
EPI_ISL_455438	GISAID	Latin America	Mexico	2020-03-14
EPI_ISL_455439	GISAID	Latin America	Mexico	2020-03-11
EPI_ISL_455455	GISAID	Latin America	Mexico	2020-03-14
EPI_ISL_493348	GISAID	Latin America	Mexico	2020-05-27
EPI_ISL_516609	GISAID	Latin America	Mexico	2020-06-27
EPI_ISL_516613	GISAID	Latin America	Mexico	2020-06-26
EPI_ISL_516620	GISAID	Latin America	Mexico	2020-06-19
EPI_ISL_516625	GISAID	Latin America	Mexico	2020-06-15
EPI_ISL_516611	GISAID	Latin America	Mexico	2020-07-05
EPI_ISL_516257	GISAID	Latin America	Mexico	2020-07-22
EPI_ISL_576260	GISAID	Latin America	Mexico	2020-08-13
EPI_ISL_576261	GISAID	Latin America	Mexico	2020-08-07
EPI_ISL_576262	GISAID	Latin America	Mexico	2020-08-14
EPI_ISL_576264	GISAID	Latin America	Mexico	2020-08-18
EPI_ISL_576265	GISAID	Latin America	Mexico	2020-08-21
EPI_ISL_576266	GISAID	Latin America	Mexico	2020-08-21
EPI_ISL_576269	GISAID	Latin America	Mexico	2020-08-16
EPI_ISL_576270	GISAID	Latin America	Mexico	2020-08-14
EPI_ISL_576272	GISAID	Latin America	Mexico	2020-08-21
EPI_ISL_576274	GISAID	Latin America	Mexico	2020-08-21
EPI_ISL_576275	GISAID	Latin America	Mexico	2020-08-14
EPI_ISL_576276	GISAID	Latin America	Mexico	2020-08-20
EPI_ISL_576277	GISAID	Latin America	Mexico	2020-08-20
EPI_ISL_576278	GISAID	Latin America	Mexico	2020-08-24
EPI_ISL_576279	GISAID	Latin America	Mexico	2020-08-24
EPI_ISL_434533	GISAID	Latin America	Costa Rica	2020-03-16
EPI_ISL_434535	GISAID	Latin America	Costa Rica	2020-03-16
EPI_ISL_434536	GISAID	Latin America	Costa Rica	2020-03-17
EPI_ISL_434538	GISAID	Latin America	Costa Rica	2020-03-17
EPI_ISL_434539	GISAID	Latin America	Costa Rica	2020-03-25
EPI_ISL_434540	GISAID	Latin America	Costa Rica	2020-03-18
EPI_ISL_512673	GISAID	Latin America	Costa Rica	2020-07-02
EPI_ISL_527747	GISAID	Latin America	Costa Rica	2020-07-03
EPI_ISL_527748	GISAID	Latin America	Costa Rica	2020-07-05
EPI_ISL_527749	GISAID	Latin America	Costa Rica	2020-07-07
EPI_ISL_527751	GISAID	Latin America	Costa Rica	2020-07-06
EPI_ISL_527752	GISAID	Latin America	Costa Rica	2020-07-08
EPI_ISL_527753	GISAID	Latin America	Costa Rica	2020-07-09
EPI_ISL_527755	GISAID	Latin America	Costa Rica	2020-07-11
EPI_ISL_527757	GISAID	Latin America	Costa Rica	2020-07-10
EPI_ISL_434541	GISAID	Latin America	Puerto Rico	2020-03-23
EPI_ISL_434543	GISAID	Latin America	Puerto Rico	2020-03-23
EPI_ISL_434545	GISAID	Latin America	Puerto Rico	2020-03-23
EPI_ISL_434546	GISAID	Latin America	Puerto Rico	2020-03-24
EPI_ISL_434547	GISAID	Latin America	Puerto Rico	2020-03-24
EPI_ISL_434549	GISAID	Latin America	Puerto Rico	2020-03-23
EPI_ISL_434551	GISAID	Latin America	Puerto Rico	2020-03-24
EPI_ISL_447845	GISAID	Latin America	Puerto Rico	2020-03-08
EPI_ISL_450793	GISAID	Latin America	Jamaica	2020-03-09
EPI_ISL_450794	GISAID	Latin America	Jamaica	2020-03-11
EPI_ISL_450795	GISAID	Latin America	Jamaica	2020-03-14
EPI_ISL_450796	GISAID	Latin America	Jamaica	2020-03-16
EPI_ISL_450797	GISAID	Latin America	Jamaica	2020-03-16
EPI_ISL_450798	GISAID	Latin America	Jamaica	2020-03-16
EPI_ISL_450799	GISAID	Latin America	Jamaica	2020-03-17
EPI_ISL_430796	GISAID	Latin America	Argentina	2020-03-27
EPI_ISL_430798	GISAID	Latin America	Argentina	2020-03-28
EPI_ISL_430799	GISAID	Latin America	Argentina	2020-03-30
EPI_ISL_430800	GISAID	Latin America	Argentina	2020-03-30
EPI_ISL_430801	GISAID	Latin America	Argentina	2020-03-31
EPI_ISL_430802	GISAID	Latin America	Argentina	2020-03-31
EPI_ISL_430804	GISAID	Latin America	Argentina	2020-04-01
EPI_ISL_430807	GISAID	Latin America	Argentina	2020-04-02
EPI_ISL_430808	GISAID	Latin America	Argentina	2020-04-03
EPI_ISL_430809	GISAID	Latin America	Argentina	2020-04-04
EPI_ISL_430811	GISAID	Latin America	Argentina	2020-04-11
EPI_ISL_430812	GISAID	Latin America	Argentina	2020-04-11
EPI_ISL_430814	GISAID	Latin America	Argentina	2020-04-17
EPI_ISL_430815	GISAID	Latin America	Argentina	2020-04-18
EPI_ISL_430816	GISAID	Latin America	Argentina	2020-04-18
EPI_ISL_430817	GISAID	Latin America	Argentina	2020-04-18
EPI_ISL_476571	GISAID	Latin America	Argentina	2020-05-19
EPI_ISL_476573	GISAID	Latin America	Argentina	2020-05-22
EPI_ISL_468760	GISAID	Latin America	Chile	2020-03-15
EPI_ISL_468752	GISAID	Latin America	Chile	2020-03-14
EPI_ISL_445371	GISAID	Latin America	Chile	2020-03-28
EPI_ISL_445372	GISAID	Latin America	Chile	2020-03-30
EPI_ISL_459857	GISAID	Latin America	Chile	2020-03-15
EPI_ISL_459858	GISAID	Latin America	Chile	2020-03-17
EPI_ISL_459859	GISAID	Latin America	Chile	2020-03-27
EPI_ISL_459860	GISAID	Latin America	Chile	2020-03-21
EPI_ISL_459861	GISAID	Latin America	Chile	2020-03-25
EPI_ISL_468747	GISAID	Latin America	Chile	2020-04-30
EPI_ISL_468748	GISAID	Latin America	Chile	2020-04-30
EPI_ISL_468749	GISAID	Latin America	Chile	2020-04-29
EPI_ISL_468750	GISAID	Latin America	Chile	2020-04-30
EPI_ISL_468751	GISAID	Latin America	Chile	2020-04-29
EPI_ISL_468757	GISAID	Latin America	Chile	2020-04-30
EPI_ISL_445375	GISAID	Latin America	Chile	2020-04-04
EPI_ISL_445376	GISAID	Latin America	Chile	2020-04-04
EPI_ISL_445377	GISAID	Latin America	Chile	2020-04-05
EPI_ISL_445370	GISAID	Latin America	Chile	2020-04-05
EPI_ISL_468758	GISAID	Latin America	Chile	2020-05-01
EPI_ISL_468759	GISAID	Latin America	Chile	2020-05-01
EPI_ISL_591527	GISAID	Latin America	Chile	2020-07-28
EPI_ISL_591531	GISAID	Latin America	Chile	2020-08-24
EPI_ISL_591532	GISAID	Latin America	Chile	2020-08-24
EPI_ISL_591533	GISAID	Latin America	Chile	2020-08-25
EPI_ISL_591534	GISAID	Latin America	Chile	2020-08-26
EPI_ISL_625673	GISAID	Latin America	Chile	2020-09-19
EPI_ISL_625674	GISAID	Latin America	Chile	2020-09-27
EPI_ISL_625675	GISAID	Latin America	Chile	2020-09-03
EPI_ISL_625676	GISAID	Latin America	Chile	2020-09-08
EPI_ISL_625677	GISAID	Latin America	Chile	2020-09-19
EPI_ISL_625678	GISAID	Latin America	Chile	2020-10-09
EPI_ISL_625679	GISAID	Latin America	Chile	2020-10-09
EPI_ISL_456146	GISAID	Latin America	Colombia	2020-03-20
EPI_ISL_456148	GISAID	Latin America	Colombia	2020-03-16
EPI_ISL_456150	GISAID	Latin America	Colombia	2020-03-15
EPI_ISL_456151	GISAID	Latin America	Colombia	2020-03-19
EPI_ISL_456155	GISAID	Latin America	Colombia	2020-03-16
EPI_ISL_447802	GISAID	Latin America	Colombia	2020-04-04
EPI_ISL_447803	GISAID	Latin America	Colombia	2020-04-04
EPI_ISL_447804	GISAID	Latin America	Colombia	2020-04-04
EPI_ISL_447805	GISAID	Latin America	Colombia	2020-04-04
EPI_ISL_447806	GISAID	Latin America	Colombia	2020-04-04
EPI_ISL_447807	GISAID	Latin America	Colombia	2020-04-04
EPI_ISL_447808	GISAID	Latin America	Colombia	2020-04-04
EPI_ISL_447809	GISAID	Latin America	Colombia	2020-04-04
EPI_ISL_447810	GISAID	Latin America	Colombia	2020-04-05
EPI_ISL_447812	GISAID	Latin America	Colombia	2020-04-05
EPI_ISL_447813	GISAID	Latin America	Colombia	2020-04-05
EPI_ISL_447816	GISAID	Latin America	Colombia	2020-04-07
EPI_ISL_456153	GISAID	Latin America	Colombia	2020-04-22
EPI_ISL_447800	GISAID	Latin America	Colombia	2020-04-04
EPI_ISL_526958	GISAID	Latin America	Colombia	2020-07-17
EPI_ISL_477014	GISAID	Latin America	Ecuador	2020-03-30
EPI_ISL_471267	GISAID	Latin America	Ecuador	2020-04-17
EPI_ISL_471268	GISAID	Latin America	Ecuador	2020-04-17
EPI_ISL_477015	GISAID	Latin America	Ecuador	2020-06-17
EPI_ISL_477016	GISAID	Latin America	Ecuador	2020-06-17
EPI_ISL_491932	GISAID	Latin America	Ecuador	2020-07-03
EPI_ISL_491939	GISAID	Latin America	Ecuador	2020-07-03
EPI_ISL_491940	GISAID	Latin America	Ecuador	2020-07-03
EPI_ISL_516648	GISAID	Latin America	Ecuador	2020-07-14
EPI_ISL_516650	GISAID	Latin America	Ecuador	2020-07-22
EPI_ISL_516651	GISAID	Latin America	Ecuador	2020-07-25
EPI_ISL_516652	GISAID	Latin America	Ecuador	2020-07-29
EPI_ISL_525432	GISAID	Latin America	Ecuador	2020-08-12
EPI_ISL_525433	GISAID	Latin America	Ecuador	2020-08-13
EPI_ISL_525435	GISAID	Latin America	Ecuador	2020-08-14
EPI_ISL_525437	GISAID	Latin America	Ecuador	2020-08-12
EPI_ISL_527811	GISAID	Latin America	Ecuador	2020-08-04
EPI_ISL_527813	GISAID	Latin America	Ecuador	2020-08-20
EPI_ISL_539784	GISAID	Latin America	Ecuador	2020-08-19
EPI_ISL_539785	GISAID	Latin America	Ecuador	2020-08-04
EPI_ISL_539787	GISAID	Latin America	Ecuador	2020-08-05
EPI_ISL_539790	GISAID	Latin America	Ecuador	2020-08-15
EPI_ISL_574431	GISAID	Latin America	Ecuador	2020-09-14
EPI_ISL_444493	GISAID	Latin America	Uruguay	2020-03-13
EPI_ISL_476704	GISAID	Latin America	Venezuela	2020-04-09
EPI_ISL_492035	GISAID	Latin America	Brazil	2020-05-29
EPI_ISL_492043	GISAID	Latin America	Brazil	2020-05-25
EPI_ISL_492044	GISAID	Latin America	Brazil	2020-05-27
EPI_ISL_510535	GISAID	Latin America	Brazil	2020-05-08
EPI_ISL_513578	GISAID	Latin America	Brazil	2020-05-04
EPI_ISL_513582	GISAID	Latin America	Brazil	2020-05-05
EPI_ISL_514133	GISAID	Latin America	Brazil	2020-05-11
EPI_ISL_514137	GISAID	Latin America	Brazil	2020-05-05
EPI_ISL_524469	GISAID	Latin America	Brazil	2020-05-05
EPI_ISL_524470	GISAID	Latin America	Brazil	2020-05-06
EPI_ISL_524785	GISAID	Latin America	Brazil	2020-05-05
EPI_ISL_524799	GISAID	Latin America	Brazil	2020-05-08
EPI_ISL_524800	GISAID	Latin America	Brazil	2020-05-13
EPI_ISL_534312	GISAID	Latin America	Brazil	2020-05-01
EPI_ISL_534314	GISAID	Latin America	Brazil	2020-05-04
EPI_ISL_534316	GISAID	Latin America	Brazil	2020-05-02
EPI_ISL_534321	GISAID	Latin America	Brazil	2020-05-07
EPI_ISL_492036	GISAID	Latin America	Brazil	2020-06-01
EPI_ISL_492048	GISAID	Latin America	Brazil	2020-06-01
EPI_ISL_514138	GISAID	Latin America	Brazil	2020-06-05
EPI_ISL_515525	GISAID	Latin America	Brazil	2020-06-30
EPI_ISL_509430	GISAID	Latin America	Brazil	2020-07-20
EPI_ISL_509431	GISAID	Latin America	Brazil	2020-07-20
EPI_ISL_509433	GISAID	Latin America	Brazil	2020-07-20
EPI_ISL_510536	GISAID	Latin America	Brazil	2020-07-20
EPI_ISL_510541	GISAID	Latin America	Brazil	2020-07-20
EPI_ISL_529139	GISAID	Latin America	Brazil	2020-07-20
EPI_ISL_547580	GISAID	Latin America	Brazil	2020-07-09
EPI_ISL_523959	GISAID	Latin America	Brazil	2020-08-15
EPI_ISL_517658	GISAID	Latin America	Suriname	2020-07-13
EPI_ISL_517659	GISAID	Latin America	Suriname	2020-07-14
EPI_ISL_518802	GISAID	Latin America	Suriname	2020-07-16
EPI_ISL_518809	GISAID	Latin America	Suriname	2020-07-16
EPI_ISL_519917	GISAID	Latin America	Suriname	2020-07-19
EPI_ISL_415787	GISAID	Latin America	Peru	2020-03-10
EPI_ISL_536479	GISAID	Latin America	Peru	2020-07-01
EPI_ISL_536484	GISAID	Latin America	Peru	2020-07-02
EPI_ISL_536486	GISAID	Latin America	Peru	2020-07-04
EPI_ISL_536491	GISAID	Latin America	Peru	2020-07-03
EPI_ISL_536498	GISAID	Latin America	Peru	2020-07-04
EPI_ISL_547922	GISAID	Latin America	Peru	2020-07-01
EPI_ISL_547925	GISAID	Latin America	Peru	2020-07-02
EPI_ISL_547928	GISAID	Latin America	Peru	2020-07-04
EPI_ISL_547934	GISAID	Latin America	Peru	2020-07-03
EPI_ISL_568518	GISAID	Latin America	Peru	2020-08-27
EPI_ISL_568525	GISAID	Latin America	Peru	2020-08-28
EPI_ISL_568537	GISAID	Latin America	Peru	2020-08-27
EPI_ISL_568545	GISAID	Latin America	Peru	2020-08-28
MT270112	NCBI	Europe	Germany	2020-01-30
MT270101	NCBI	Europe	Germany	2020-01-28
MT270103	NCBI	Europe	Germany	2020-01-28
MT270108	NCBI	Europe	Germany	2020/01
MT270105	NCBI	Europe	Germany	2020/01
MT270109	NCBI	Europe	Germany	2020/01
MT270104	NCBI	Europe	Germany	2020/01
MT582499	NCBI	Europe	Germany	2020-02-28
MT358642	NCBI	Europe	Germany	2020/02
MT358639	NCBI	Europe	Germany	2020/02
MT270106	NCBI	Europe	Germany	2020-02-01
MT270113	NCBI	Europe	Germany	2020/02
MT270110	NCBI	Europe	Germany	2020-02-07
MT270111	NCBI	Europe	Germany	2020-02-08
MT270107	NCBI	Europe	Germany	2020-02-03
MT358638	NCBI	Europe	Germany	2020/02
MT582498	NCBI	Europe	Germany	2020-02-25
MT358641	NCBI	Europe	Germany	2020/02
MT582491	NCBI	Europe	Germany	2020-02-28
MT582494	NCBI	Europe	Germany	2020-02-27
MT318827	NCBI	Europe	Germany	2020-03-19
MT582481	NCBI	Europe	Germany	2020-03-14
MT582459	NCBI	Europe	Germany	2020-03-18
MT582472	NCBI	Europe	Germany	2020-03-15
MT582462	NCBI	Europe	Germany	2020-03-16
MT582476	NCBI	Europe	Germany	2020-03-14
MT582468	NCBI	Europe	Germany	2020-03-15
MT582477	NCBI	Europe	Germany	2020-03-16
MT582460	NCBI	Europe	Germany	2020-03-17
MT582458	NCBI	Europe	Germany	2020-03-18
MT582479	NCBI	Europe	Germany	2020-03-14
MT582480	NCBI	Europe	Germany	2020-03-14
MT582488	NCBI	Europe	Germany	2020-03-10
MT582478	NCBI	Europe	Germany	2020-03-15
MT582482	NCBI	Europe	Germany	2020-03-13
MT582474	NCBI	Europe	Germany	2020-03-15
MT582463	NCBI	Europe	Germany	2020-03-16
MT582467	NCBI	Europe	Germany	2020-03-16
MT582466	NCBI	Europe	Germany	2020-03-16
MT582456	NCBI	Europe	Germany	2020-03-19
MT582454	NCBI	Europe	Germany	2020-03-21
MT582465	NCBI	Europe	Germany	2020-03-16
MT582483	NCBI	Europe	Germany	2020-03-11
MT582484	NCBI	Europe	Germany	2020-03-11
MT582486	NCBI	Europe	Germany	2020-03-11
EPI_ISL_631295	GISAID	Europe	Germany	2020-06-17
EPI_ISL_487416	GISAID	Europe	Germany	2020-06-15
EPI_ISL_631299	GISAID	Europe	Germany	2020-06-09
EPI_ISL_631368	GISAID	Europe	Germany	2020-09-14
EPI_ISL_631376	GISAID	Europe	Germany	2020-09-15
EPI_ISL_631304	GISAID	Europe	Germany	2020-10-05
EPI_ISL_631313	GISAID	Europe	Germany	2020-10-05
EPI_ISL_631319	GISAID	Europe	Germany	2020-10-06
MT233519	NCBI	Europe	Spain	2020-02-27
MT359866	NCBI	Europe	Spain	2020-03-15
MT292570	NCBI	Europe	Spain	2020-03-10
MT292575	NCBI	Europe	Spain	2020-03-10
MT359865	NCBI	Europe	Spain	2020-03-15
MT292569	NCBI	Europe	Spain	2020-03-09
MT292573	NCBI	Europe	Spain	2020-03-09
MT233523	NCBI	Europe	Spain	2020-03-04
MT292571	NCBI	Europe	Spain	2020-03-09
MT292574	NCBI	Europe	Spain	2020-03-02
MT198652	NCBI	Europe	Spain	2020-03-05
MT292572	NCBI	Europe	Spain	2020-03-10
MT576027	NCBI	Europe	Spain	2020-05-30
MT576028	NCBI	Europe	Spain	2020-05-30
MT576025	NCBI	Europe	Spain	2020-05-30
MT576026	NCBI	Europe	Spain	2020-05-30
MT576030	NCBI	Europe	Spain	2020-05-30
MT576029	NCBI	Europe	Spain	2020-05-30
MT956915	NCBI	Europe	Spain	2020-05-15
MT956916	NCBI	Europe	Spain	2020-05-11
EPI_ISL_486876	GISAID	Europe	Spain	2020-06-06
EPI_ISL_490977	GISAID	Europe	Spain	2020-06-09
MW056032	NCBI	Europe	Spain	2020-08-08
MW056033	NCBI	Europe	Spain	2020-08-05
MW056034	NCBI	Europe	Spain	2020-08-08
MT953878	NCBI	Europe	Spain	2020-08-03
MT953879	NCBI	Europe	Spain	2020-08-08
MT953880	NCBI	Europe	Spain	2020-08-08
EPI_ISL_582083	GISAID	Europe	Spain	2020-09-16
MT020781	NCBI	Europe	Finland	2020-01-29
MT470125	NCBI	Europe	France	2020/03
MT470103	NCBI	Europe	France	2020/03
MT470156	NCBI	Europe	France	2020/03
MT470171	NCBI	Europe	France	2020/03
MT470168	NCBI	Europe	France	2020/03
MT470144	NCBI	Europe	France	2020/03
MT470123	NCBI	Europe	France	2020/03
MT470146	NCBI	Europe	France	2020/03
MT470132	NCBI	Europe	France	2020/03
MT470160	NCBI	Europe	France	2020/03
MT470147	NCBI	Europe	France	2020/03
MT470166	NCBI	Europe	France	2020/03
MT470126	NCBI	Europe	France	2020/03
MT470157	NCBI	Europe	France	2020/03
MT470120	NCBI	Europe	France	2020/03
MT470172	NCBI	Europe	France	2020/03
MT470109	NCBI	Europe	France	2020/03
MT470119	NCBI	Europe	France	2020/03
MT470154	NCBI	Europe	France	2020/03
MT470117	NCBI	Europe	France	2020/03
MT470151	NCBI	Europe	France	2020/03
MT470170	NCBI	Europe	France	2020/03
MT470121	NCBI	Europe	France	2020/03
MT470135	NCBI	Europe	France	2020/03
MT470105	NCBI	Europe	France	2020/03
MT470161	NCBI	Europe	France	2020/03
MT470178	NCBI	Europe	France	2020/03
MT470112	NCBI	Europe	France	2020/03
MT470149	NCBI	Europe	France	2020/03
MT470107	NCBI	Europe	France	2020/03
MT470169	NCBI	Europe	France	2020/03
MT470128	NCBI	Europe	France	2020/03
MT470179	NCBI	Europe	France	2020/03
MT470134	NCBI	Europe	France	2020/03
MT470177	NCBI	Europe	France	2020/03
MT470116	NCBI	Europe	France	2020/03
MT470176	NCBI	Europe	France	2020/03
MT470127	NCBI	Europe	France	2020/03
MT470124	NCBI	Europe	France	2020/03
MT470114	NCBI	Europe	France	2020/03
MT470113	NCBI	Europe	France	2020/03
MT470153	NCBI	Europe	France	2020/03
MT470164	NCBI	Europe	France	2020/03
MT470136	NCBI	Europe	France	2020/03
MT470101	NCBI	Europe	France	2020/03
MT470106	NCBI	Europe	France	2020/03
MT320538	NCBI	Europe	France	2020/03
MT470133	NCBI	Europe	France	2020/03
MT470140	NCBI	Europe	France	2020/03
MT470138	NCBI	Europe	France	2020/03
MT470118	NCBI	Europe	France	2020/03
MT470148	NCBI	Europe	France	2020/03
MT470167	NCBI	Europe	France	2020/03
MT470173	NCBI	Europe	France	2020/03
MT470162	NCBI	Europe	France	2020/03
MT470155	NCBI	Europe	France	2020/03
MT470110	NCBI	Europe	France	2020/03
MT470143	NCBI	Europe	France	2020/03
MT470165	NCBI	Europe	France	2020/03
MT470102	NCBI	Europe	France	2020/03
MT470115	NCBI	Europe	France	2020/03
MT470137	NCBI	Europe	France	2020/03
MT470104	NCBI	Europe	France	2020/03
MT470111	NCBI	Europe	France	2020/03
MT470159	NCBI	Europe	France	2020/03
MT470145	NCBI	Europe	France	2020/03
MT470100	NCBI	Europe	France	2020/03
MT470122	NCBI	Europe	France	2020/03
MT470152	NCBI	Europe	France	2020/03
MT470139	NCBI	Europe	France	2020/03
MT470108	NCBI	Europe	France	2020/03
MT470141	NCBI	Europe	France	2020/03
MT470174	NCBI	Europe	France	2020/03
MT470150	NCBI	Europe	France	2020/03
MT470130	NCBI	Europe	France	2020/03
MT470129	NCBI	Europe	France	2020/03
MT470175	NCBI	Europe	France	2020/03
MT470163	NCBI	Europe	France	2020/03
MT470131	NCBI	Europe	France	2020/03
MT470158	NCBI	Europe	France	2020/03
MT470142	NCBI	Europe	France	2020/03
MT709104	NCBI	Europe	France	2020-05-14
MT709105	NCBI	Europe	France	2020-05-14
MT777677	NCBI	Europe	France	2020-05-01
EPI_ISL_591099	GISAID	Europe	France	2020-06-08
EPI_ISL_593855	GISAID	Europe	France	2020-06-11
EPI_ISL_593891	GISAID	Europe	France	2020-06-19
EPI_ISL_623101	GISAID	Europe	France	2020-09-08
EPI_ISL_623102	GISAID	Europe	France	2020-09-09
EPI_ISL_593895	GISAID	Europe	France	2020-10-05
EPI_ISL_593896	GISAID	Europe	France	2020-10-04
EPI_ISL_593897	GISAID	Europe	France	2020-10-03
EPI_ISL_593900	GISAID	Europe	France	2020-10-02
EPI_ISL_593936	GISAID	Europe	France	2020-10-01
MT511068	NCBI	Europe	Poland	2020-03-31
MT511079	NCBI	Europe	Poland	2020-03-29
MT511070	NCBI	Europe	Poland	2020-03-31
MT511077	NCBI	Europe	Poland	2020-03-29
MT511074	NCBI	Europe	Poland	2020-03-31
MT511081	NCBI	Europe	Poland	2020-04-07
MT499210	NCBI	Europe	Poland	2020-04-11
MT499209	NCBI	Europe	Poland	2020-04-11
MT499208	NCBI	Europe	Poland	2020-04-11
MT511075	NCBI	Europe	Poland	2020-04-02
MT511066	NCBI	Europe	Poland	2020-04-01
MT511076	NCBI	Europe	Poland	2020-04-07
MT511082	NCBI	Europe	Poland	2020-04-01
MT511069	NCBI	Europe	Poland	2020-04-03
MT511072	NCBI	Europe	Poland	2020-04-03
MT511067	NCBI	Europe	Poland	2020-04-02
MT576645	NCBI	Europe	Poland	2020-05-13
EPI_ISL_582031	GISAID	Europe	Poland	2020-09-05
EPI_ISL_582032	GISAID	Europe	Poland	2020-09-05
MT517423	NCBI	Europe	Czech Republic	2020-03-28
MT517428	NCBI	Europe	Czech Republic	2020-03-26
MT517422	NCBI	Europe	Czech Republic	2020-03-26
MT517431	NCBI	Europe	Czech Republic	2020-03-27
MT517433	NCBI	Europe	Czech Republic	2020-03-28
MT517434	NCBI	Europe	Czech Republic	2020-03-29
MT371572	NCBI	Europe	Czech Republic	2020-03-19
MT371570	NCBI	Europe	Czech Republic	2020-03-21
MT371573	NCBI	Europe	Czech Republic	2020-03-17
MT371571	NCBI	Europe	Czech Republic	2020-03-18
MT517429	NCBI	Europe	Czech Republic	2020-03-27
MT371574	NCBI	Europe	Czech Republic	2020-03-18
MT517420	NCBI	Europe	Czech Republic	2020-03-27
MT517427	NCBI	Europe	Czech Republic	2020-03-26
MT517424	NCBI	Europe	Czech Republic	2020-03-31
MT517421	NCBI	Europe	Czech Republic	2020-03-27
MT517425	NCBI	Europe	Czech Republic	2020-03-31
MT517432	NCBI	Europe	Czech Republic	2020-03-27
MT517430	NCBI	Europe	Czech Republic	2020-03-27
MT517426	NCBI	Europe	Czech Republic	2020-04-27
EPI_ISL_584075	GISAID	Europe	Czech Republic	2020-06-19
EPI_ISL_584077	GISAID	Europe	Czech Republic	2020-06-21
EPI_ISL_626582	GISAID	Europe	Czech Republic	2020-09-15
EPI_ISL_626587	GISAID	Europe	Czech Republic	2020-09-28
MT093571	NCBI	Europe	Sweden	2020-02-07
MT459886	NCBI	Europe	Greece	2020-03-17
MT459832	NCBI	Europe	Greece	2020-03-24
MT459836	NCBI	Europe	Greece	2020-03-14
MT459846	NCBI	Europe	Greece	2020-03-26
MT459903	NCBI	Europe	Greece	2020-03-23
MT459904	NCBI	Europe	Greece	2020-03-28
MT459922	NCBI	Europe	Greece	2020-03-11
MT459841	NCBI	Europe	Greece	2020-03-29
MT328032	NCBI	Europe	Greece	2020-03-18
MT459911	NCBI	Europe	Greece	2020-03-14
MT459891	NCBI	Europe	Greece	2020-03-17
MT459885	NCBI	Europe	Greece	2020-03-17
MT459878	NCBI	Europe	Greece	2020-03-14
MT459838	NCBI	Europe	Greece	2020-03-28
MT459834	NCBI	Europe	Greece	2020-03-23
MT459910	NCBI	Europe	Greece	2020-03-11
MT459853	NCBI	Europe	Greece	2020-03-11
MT459857	NCBI	Europe	Greece	2020-03-12
MT459852	NCBI	Europe	Greece	2020-03-11
MT582487	NCBI	Europe	Greece	2020-03-11
MT328033	NCBI	Europe	Greece	2020-03-18
MT459870	NCBI	Europe	Greece	2020-03-12
MT328035	NCBI	Europe	Greece	2020-03-18
MT459876	NCBI	Europe	Greece	2020-03-14
MT459867	NCBI	Europe	Greece	2020-03-20
MT459863	NCBI	Europe	Greece	2020-03-09
MT459921	NCBI	Europe	Greece	2020-03-11
MT459887	NCBI	Europe	Greece	2020-03-18
MT459884	NCBI	Europe	Greece	2020-03-16
MT459854	NCBI	Europe	Greece	2020-03-11
MT459898	NCBI	Europe	Greece	2020-03-07
MT459913	NCBI	Europe	Greece	2020-03-11
MT459906	NCBI	Europe	Greece	2020-03-18
MT459843	NCBI	Europe	Greece	2020-03-23
MT459912	NCBI	Europe	Greece	2020-03-11
MT459866	NCBI	Europe	Greece	2020-03-13
MT459842	NCBI	Europe	Greece	2020-03-23
MT459902	NCBI	Europe	Greece	2020-03-10
MT459901	NCBI	Europe	Greece	2020-03-09
MT459855	NCBI	Europe	Greece	2020-03-12
MT459874	NCBI	Europe	Greece	2020-03-13
MT459914	NCBI	Europe	Greece	2020-03-09
MT459869	NCBI	Europe	Greece	2020-03-16
MT459851	NCBI	Europe	Greece	2020-03-10
MT459907	NCBI	Europe	Greece	2020-03-10
MT459875	NCBI	Europe	Greece	2020-03-13
MT459839	NCBI	Europe	Greece	2020-03-20
MT459920	NCBI	Europe	Greece	2020-03-11
MT459909	NCBI	Europe	Greece	2020-03-10
MT459848	NCBI	Europe	Greece	2020-03-31
MT459859	NCBI	Europe	Greece	2020-03-16
MT459879	NCBI	Europe	Greece	2020-03-14
MT459871	NCBI	Europe	Greece	2020-03-12
MT459868	NCBI	Europe	Greece	2020-03-19
MT459858	NCBI	Europe	Greece	2020-03-14
MT459880	NCBI	Europe	Greece	2020-03-14
MT459900	NCBI	Europe	Greece	2020-03-08
MT459908	NCBI	Europe	Greece	2020-03-10
MT459849	NCBI	Europe	Greece	2020-03-09
MT459917	NCBI	Europe	Greece	2020-03-10
MT459897	NCBI	Europe	Greece	2020-03-05
MT459896	NCBI	Europe	Greece	2020-03-29
MT459915	NCBI	Europe	Greece	2020-03-10
MT459872	NCBI	Europe	Greece	2020-03-12
MT459840	NCBI	Europe	Greece	2020-03-23
MT459888	NCBI	Europe	Greece	2020-03-18
MT459905	NCBI	Europe	Greece	2020-03-23
MT459925	NCBI	Europe	Greece	2020-03-31
MT459845	NCBI	Europe	Greece	2020-03-22
MT328034	NCBI	Europe	Greece	2020-03-18
MT459861	NCBI	Europe	Greece	2020-03-16
MT459899	NCBI	Europe	Greece	2020-03-07
MT459865	NCBI	Europe	Greece	2020-03-12
MT459883	NCBI	Europe	Greece	2020-03-16
MT459894	NCBI	Europe	Greece	2020-03-19
MT459844	NCBI	Europe	Greece	2020-03-23
MT459837	NCBI	Europe	Greece	2020-03-29
MT459862	NCBI	Europe	Greece	2020-03-19
MT459923	NCBI	Europe	Greece	2020-03-27
MT459864	NCBI	Europe	Greece	2020-03-11
MT459860	NCBI	Europe	Greece	2020-03-16
MT459850	NCBI	Europe	Greece	2020-03-10
MT459924	NCBI	Europe	Greece	2020-04-01
MT459847	NCBI	Europe	Greece	2020-04-04
MT457392	NCBI	Europe	Netherlands	2020-04-29
MT457391	NCBI	Europe	Netherlands	2020-04-29
MT457393	NCBI	Europe	Netherlands	2020-04-29
MT396266	NCBI	Europe	Netherlands	2020-04-24
MT457398	NCBI	Europe	Netherlands	2020-04-25
MT457394	NCBI	Europe	Netherlands	2020-04-29
MT457395	NCBI	Europe	Netherlands	2020-04-29
MT457399	NCBI	Europe	Netherlands	2020-04-28
MT457396	NCBI	Europe	Netherlands	2020-04-29
MT457397	NCBI	Europe	Netherlands	2020-04-29
MT457401	NCBI	Europe	Netherlands	2020-05-06
MT457400	NCBI	Europe	Netherlands	2020-05-06
EPI_ISL_636557	GISAID	Europe	Netherlands	2020-06-23
EPI_ISL_632499	GISAID	Europe	Netherlands	2020-09-12
EPI_ISL_632589	GISAID	Europe	Netherlands	2020-09-14
EPI_ISL_636590	GISAID	Europe	Netherlands	2020-09-07
EPI_ISL_632445	GISAID	Europe	Netherlands	2020-10-08
EPI_ISL_632512	GISAID	Europe	Netherlands	2020-10-02
EPI_ISL_632688	GISAID	Europe	Netherlands	2020-10-15
EPI_ISL_632794	GISAID	Europe	Netherlands	2020-10-30
EPI_ISL_636535	GISAID	Europe	Netherlands	2020-10-01
EPI_ISL_636571	GISAID	Europe	Netherlands	2020-10-14
EPI_ISL_636580	GISAID	Europe	Netherlands	2020-10-05
MT066156	NCBI	Europe	Italy	2020-01-30
MT077125	NCBI	Europe	Italy	2020-01-31
MT527178	NCBI	Europe	Italy	2020-02-28
MT531537	NCBI	Europe	Italy	2020-03-01
MT528239	NCBI	Europe	Italy	2020-03-04
MT528237	NCBI	Europe	Italy	2020-03-07
MT527184	NCBI	Europe	Italy	2020-03-23
MT525950	NCBI	Europe	Italy	2020-03-01
EPI_ISL_603157	GISAID	Europe	Italy	2020-06-02
EPI_ISL_583957	GISAID	Europe	Italy	2020-06-07
EPI_ISL_603159	GISAID	Europe	Italy	2020-06-04
EPI_ISL_572321	GISAID	Europe	Italy	2020-09-12
EPI_ISL_584072	GISAID	Europe	Italy	2020-09-12
EPI_ISL_486854	GISAID	Europe	Romania	2020-06-10
EPI_ISL_491039	GISAID	Europe	Romania	2020-06-05
EPI_ISL_596330	GISAID	Europe	Russia	2020-06-01
EPI_ISL_596341	GISAID	Europe	Russia	2020-06-10
EPI_ISL_596313	GISAID	Europe	Russia	2020-09-02
EPI_ISL_602389	GISAID	Europe	Russia	2020-09-18
EPI_ISL_602456	GISAID	Europe	Russia	2020-09-23
EPI_ISL_585247	GISAID	Europe	Northern Ireland	2020-06-01
MT459979	NCBI	Europe	Serbia	2020-04-04
MT450872	NCBI	Europe	Serbia	2020-04-13
MT569470	NCBI	Europe	Serbia	2020-04-01
MT569474	NCBI	Europe	Serbia	2020-04-22
MT569472	NCBI	Europe	Serbia	2020-04-28
MT569473	NCBI	Europe	Serbia	2020-04-23
MT569471	NCBI	Europe	Serbia	2020-05-10
MT883501	NCBI	Europe	Serbia	2020-05-11
MW127523	NCBI	Europe	Serbia	2020-07-20
MW127524	NCBI	Europe	Serbia	2020-07-24
MW127525	NCBI	Europe	Serbia	2020-07-24
MW127526	NCBI	Europe	Serbia	2020-07-24
MW012266	NCBI	Europe	Serbia	2020-07-08
MW012267	NCBI	Europe	Serbia	2020-07-12
MW012268	NCBI	Europe	Serbia	2020-07-06
MW012269	NCBI	Europe	Serbia	2020-07-14
MW012270	NCBI	Europe	Serbia	2020-07-19
MW012271	NCBI	Europe	Serbia	2020-07-21
MW012272	NCBI	Europe	Serbia	2020-07-23
MW012273	NCBI	Europe	Serbia	2020-07-06
MW012274	NCBI	Europe	Serbia	2020-07-06
MW012275	NCBI	Europe	Serbia	2020-07-06
MW012276	NCBI	Europe	Serbia	2020-07-08
MW012277	NCBI	Europe	Serbia	2020-07-20
MW012278	NCBI	Europe	Serbia	2020-07-09
MW012279	NCBI	Europe	Serbia	2020-07-15
MT883502	NCBI	Europe	Serbia	2020-07-11
MT883503	NCBI	Europe	Serbia	2020-07-14
MT883504	NCBI	Europe	Serbia	2020-07-14
MT883505	NCBI	Europe	Serbia	2020-07-15
MW079418	NCBI	Europe	Malta	2020-08-19
MW079422	NCBI	Europe	Malta	2020-08-20
EPI_ISL_636600	GISAID	Europe	St Eustatius	2020-09-08
EPI_ISL_636601	GISAID	Europe	St Eustatius	2020-09-08
EPI_ISL_636602	GISAID	Europe	St Eustatius	2020-09-08
EPI_ISL_636603	GISAID	Europe	St Eustatius	2020-09-07
EPI_ISL_627865	GISAID	Europe	Wales	2020-09-18
EPI_ISL_634803	GISAID	Europe	Wales	2020-10-21
EPI_ISL_636885	GISAID	Europe	Lithuania	2020-09-03
EPI_ISL_636898	GISAID	Europe	Lithuania	2020-09-12
EPI_ISL_635126	GISAID	Europe	Norway	2020-09-30
EPI_ISL_635151	GISAID	Europe	Norway	2020-09-04
EPI_ISL_635077	GISAID	Europe	Norway	2020-10-27
EPI_ISL_635089	GISAID	Europe	Norway	2020-10-05
EPI_ISL_635161	GISAID	Europe	Norway	2020-10-18
EPI_ISL_635177	GISAID	Europe	Norway	2020-10-02
EPI_ISL_635191	GISAID	Europe	Norway	2020-10-12
EPI_ISL_635197	GISAID	Europe	Norway	2020-10-06
EPI_ISL_634888	GISAID	Europe	Belgium	2020-10-02
EPI_ISL_618156	GISAID	Europe	Denmark	2020-06-29
EPI_ISL_618335	GISAID	Europe	Denmark	2020-06-08
EPI_ISL_622304	GISAID	Europe	Denmark	2020-09-21
EPI_ISL_6223759	GISAID	Europe	Denmark	2020-09-14
EPI_ISL_626124	GISAID	Europe	Denmark	2020-11-02
EPI_ISL_626127	GISAID	Europe	Denmark	2020-11-02
EPI_ISL_626129	GISAID	Europe	Denmark	2020-11-02
EPI_ISL_626132	GISAID	Europe	Denmark	2020-11-02
EPI_ISL_626133	GISAID	Europe	Denmark	2020-11-02
EPI_ISL_626134	GISAID	Europe	Denmark	2020-11-02
EPI_ISL_626137	GISAID	Europe	Denmark	2020-11-02
EPI_ISL_626138	GISAID	Europe	Denmark	2020-11-02
EPI_ISL_626139	GISAID	Europe	Denmark	2020-11-02
EPI_ISL_626144	GISAID	Europe	Denmark	2020-11-02
EPI_ISL_626146	GISAID	Europe	Denmark	2020-11-02
EPI_ISL_626148	GISAID	Europe	Denmark	2020-11-02
EPI_ISL_626149	GISAID	Europe	Denmark	2020-11-02
EPI_ISL_626157	GISAID	Europe	Denmark	2020-11-02
EPI_ISL_626162	GISAID	Europe	Denmark	2020-11-02
EPI_ISL_626164	GISAID	Europe	Denmark	2020-11-02
EPI_ISL_584523	GISAID	Europe	England	2020-06-05
EPI_ISL_584555	GISAID	Europe	England	2020-06-14
EPI_ISL_602161	GISAID	Europe	England	2020-06-25
EPI_ISL_584560	GISAID	Europe	England	2020-06-16
EPI_ISL_628543	GISAID	Europe	England	2020-09-05
EPI_ISL_606407	GISAID	Europe	England	2020-10-13
EPI_ISL_608461	GISAID	Europe	England	2020-10-10
EPI_ISL_609861	GISAID	Europe	England	2020-10-10
EPI_ISL_586576	GISAID	Europe	England	2020-10-06
EPI_ISL_586586	GISAID	Europe	England	2020-10-05
EPI_ISL_636723	GISAID	Europe	England	2020-10-21
EPI_ISL_636730	GISAID	Europe	England	2020-10-23
EPI_ISL_627708	GISAID	Europe	England	2020-11-01
EPI_ISL_627709	GISAID	Europe	England	2020-11-01
EPI_ISL_627710	GISAID	Europe	England	2020-11-01
EPI_ISL_627713	GISAID	Europe	England	2020-11-02
EPI_ISL_627714	GISAID	Europe	England	2020-11-02
EPI_ISL_627715	GISAID	Europe	England	2020-11-02
EPI_ISL_627716	GISAID	Europe	England	2020-11-01
EPI_ISL_627717	GISAID	Europe	England	2020-11-02
EPI_ISL_627718	GISAID	Europe	England	2020-11-02
EPI_ISL_627719	GISAID	Europe	England	2020-11-02
EPI_ISL_627720	GISAID	Europe	England	2020-11-03
EPI_ISL_627721	GISAID	Europe	England	2020-11-03
EPI_ISL_627722	GISAID	Europe	England	2020-11-04
EPI_ISL_627723	GISAID	Europe	England	2020-11-04
EPI_ISL_627724	GISAID	Europe	England	2020-11-04
EPI_ISL_627725	GISAID	Europe	England	2020-11-04
EPI_ISL_627726	GISAID	Europe	England	2020-11-04
EPI_ISL_627727	GISAID	Europe	England	2020-11-02
EPI_ISL_627729	GISAID	Europe	England	2020-11-03
EPI_ISL_627729	GISAID	Europe	England	2020-11-03
EPI_ISL_430819	GISAID	Africa	Egypt	2020-03-18
EPI_ISL_468047	GISAID	Africa	Egypt	2020-05-02
EPI_ISL_468048	GISAID	Africa	Egypt	2020-05-02
EPI_ISL_468049	GISAID	Africa	Egypt	2020-05-02
EPI_ISL_468052	GISAID	Africa	Egypt	2020-05-02
EPI_ISL_479687	GISAID	Africa	Egypt	2020-06-02
EPI_ISL_479689	GISAID	Africa	Egypt	2020-06-02
EPI_ISL_479690	GISAID	Africa	Egypt	2020-06-02
EPI_ISL_479694	GISAID	Africa	Egypt	2020-06-02
EPI_ISL_479714	GISAID	Africa	Egypt	2020-06-02
EPI_ISL_529141	GISAID	Africa	Egypt	2020-07-19
EPI_ISL_529142	GISAID	Africa	Egypt	2020-07-19
EPI_ISL_529143	GISAID	Africa	Egypt	2020-07-19
EPI_ISL_529144	GISAID	Africa	Egypt	2020-07-19
EPI_ISL_576373	GISAID	Africa	Egypt	2020-07-19
EPI_ISL_524426	GISAID	Africa	Egypt	2020-07-19
EPI_ISL_524427	GISAID	Africa	Egypt	2020-07-19
EPI_ISL_526976	GISAID	Africa	Egypt	2020-08-14
EPI_ISL_526981	GISAID	Africa	Egypt	2020-08-14
EPI_ISL_526985	GISAID	Africa	Egypt	2020-08-14
EPI_ISL_526988	GISAID	Africa	Egypt	2020-08-17
EPI_ISL_526991	GISAID	Africa	Egypt	2020-08-17
EPI_ISL_526994	GISAID	Africa	Egypt	2020-08-17
EPI_ISL_526998	GISAID	Africa	Egypt	2020-08-22
EPI_ISL_527001	GISAID	Africa	Egypt	2020-08-22
EPI_ISL_527004	GISAID	Africa	Egypt	2020-08-22
EPI_ISL_528386	GISAID	Africa	Egypt	2020-08-22
EPI_ISL_476559	GISAID	Africa	Morocco	2020-02-27
EPI_ISL_471456	GISAID	Africa	Morocco	2020-03-31
EPI_ISL_469052	GISAID	Africa	Morocco	2020-03-30
EPI_ISL_469053	GISAID	Africa	Morocco	2020-03-30
EPI_ISL_471457	GISAID	Africa	Morocco	2020-04-13
EPI_ISL_471458	GISAID	Africa	Morocco	2020-04-19
EPI_ISL_471459	GISAID	Africa	Morocco	2020-04-19
EPI_ISL_469051	GISAID	Africa	Morocco	2020-04-03
EPI_ISL_469054	GISAID	Africa	Morocco	2020-04-01
EPI_ISL_459981	GISAID	Africa	Morocco	2020-04-19
EPI_ISL_459982	GISAID	Africa	Morocco	2020-04-18
EPI_ISL_459983	GISAID	Africa	Morocco	2020-04-21
EPI_ISL_527873	GISAID	Africa	Nigeria	2020-02-21
EPI_ISL_455412	GISAID	Africa	Nigeria	2020-03-29
EPI_ISL_455422	GISAID	Africa	Nigeria	2020-03-29
EPI_ISL_455423	GISAID	Africa	Nigeria	2020-03-29
EPI_ISL_455424	GISAID	Africa	Nigeria	2020-03-29
EPI_ISL_455426	GISAID	Africa	Nigeria	2020-03-29
EPI_ISL_455429	GISAID	Africa	Nigeria	2020-03-27
EPI_ISL_462992	GISAID	Africa	Nigeria	2020/03
EPI_ISL_455431	GISAID	Africa	Nigeria	2020-04-02
EPI_ISL_455362	GISAID	Africa	Nigeria	2020-04-10
EPI_ISL_420070	GISAID	Africa	Senegal	2020-03-17
EPI_ISL_420073	GISAID	Africa	Senegal	2020-03-19
EPI_ISL_420074	GISAID	Africa	Senegal	2020-03-20
EPI_ISL_420076	GISAID	Africa	Senegal	2020-03-20
EPI_ISL_476514	GISAID	Africa	Senegal	2020-06-12
EPI_ISL_476833	GISAID	Africa	Benin	2020-03-17
EPI_ISL_476824	GISAID	Africa	Benin	2020-03-17
EPI_ISL_476831	GISAID	Africa	Benin	2020-04-15
EPI_ISL_463001	GISAID	Africa	Tunisia	2020-03-18
EPI_ISL_463003	GISAID	Africa	Tunisia	2020-03-30
EPI_ISL_463005	GISAID	Africa	Tunisia	2020-03-27
EPI_ISL_463006	GISAID	Africa	Tunisia	2020-03-31
EPI_ISL_458286	GISAID	Africa	Tunisia	2020-03-24
EPI_ISL_463004	GISAID	Africa	Tunisia	2020-04-01
EPI_ISL_632310	GISAID	Africa	Tunisia	2020-10-31
EPI_ISL_634977	GISAID	Africa	Tunisia	2020-10-31
EPI_ISL_635059	GISAID	Africa	Tunisia	2020-11-02
EPI_ISL_635060	GISAID	Africa	Tunisia	2020-11-02
EPI_ISL_635061	GISAID	Africa	Tunisia	2020-11-02
EPI_ISL_635062	GISAID	Africa	Tunisia	2020-11-02
EPI_ISL_458000	GISAID	Africa	Kenya	2020-03-17
EPI_ISL_457833	GISAID	Africa	Kenya	2020-03-20
EPI_ISL_457843	GISAID	Africa	Kenya	2020-03-29
EPI_ISL_457854	GISAID	Africa	Kenya	2020-04-19
EPI_ISL_457867	GISAID	Africa	Kenya	2020-04-22
EPI_ISL_428855	GISAID	Africa	Gambia	2020-03-17
EPI_ISL_428856	GISAID	Africa	Gambia	2020-03-21
EPI_ISL_471163	GISAID	Africa	Gambia	2020-04-30
EPI_ISL_428857	GISAID	Africa	Gambia	2020-04-20
EPI_ISL_471167	GISAID	Africa	Gambia	2020-05-04
EPI_ISL_471171	GISAID	Africa	Gambia	2020-05-07
EPI_ISL_561102	GISAID	Africa	Gambia	2020-07-27
EPI_ISL_561110	GISAID	Africa	Gambia	2020-07-21
EPI_ISL_561132	GISAID	Africa	Gambia	2020-07-21
EPI_ISL_561142	GISAID	Africa	Gambia	2020-07-22
EPI_ISL_561146	GISAID	Africa	Gambia	2020-07-22
EPI_ISL_561158	GISAID	Africa	Gambia	2020-07-24
EPI_ISL_561304	GISAID	Africa	Gambia	2020-07-26
EPI_ISL_561310	GISAID	Africa	Gambia	2020-07-17
EPI_ISL_561013	GISAID	Africa	Gambia	2020-07-30
EPI_ISL_561091	GISAID	Africa	Gambia	2020-07-27
EPI_ISL_561223	GISAID	Africa	Gambia	2020-07-02
EPI_ISL_561290	GISAID	Africa	Gambia	2020-07-23
EPI_ISL_561293	GISAID	Africa	Gambia	2020-07-25
EPI_ISL_561295	GISAID	Africa	Gambia	2020-07-27
EPI_ISL_561237	GISAID	Africa	Gambia	2020-08-04
EPI_ISL_561283	GISAID	Africa	Gambia	2020-08-18
EPI_ISL_561288	GISAID	Africa	Gambia	2020-08-03
EPI_ISL_561289	GISAID	Africa	Gambia	2020-08-04
EPI_ISL_418241	GISAID	Africa	Algeria	2020-03-02
EPI_ISL_418242	GISAID	Africa	Algeria	2020-03-08
EPI_ISL_420037	GISAID	Africa	Algeria	2020-03-02
EPI_ISL_451183	GISAID	Africa	Uganda	2020-03-25
EPI_ISL_451184	GISAID	Africa	Uganda	2020-03-26
EPI_ISL_451186	GISAID	Africa	Uganda	2020-03-27
EPI_ISL_451192	GISAID	Africa	Uganda	2020-03-30
EPI_ISL_451193	GISAID	Africa	Uganda	2020-03-30
EPI_ISL_451198	GISAID	Africa	Uganda	2020-04-27
EPI_ISL_451199	GISAID	Africa	Uganda	2020-04-20
EPI_ISL_451201	GISAID	Africa	Uganda	2020-04-30
EPI_ISL_451202	GISAID	Africa	Uganda	2020-05-01
EPI_ISL_471408	GISAID	Africa	RDC	2020-04-27
EPI_ISL_464153	GISAID	Africa	South Africa	2020-04-09
EPI_ISL_464155	GISAID	Africa	South Africa	2020-04-08
EPI_ISL_464157	GISAID	Africa	South Africa	2020-04-08
EPI_ISL_467467	GISAID	Africa	South Africa	2020-04-05
EPI_ISL_467471	GISAID	Africa	South Africa	2020-04-01
EPI_ISL_467473	GISAID	Africa	South Africa	2020-04-01
EPI_ISL_467482	GISAID	Africa	South Africa	2020-05-13
EPI_ISL_467484	GISAID	Africa	South Africa	2020-05-13
EPI_ISL_467490	GISAID	Africa	South Africa	2020-05-14
EPI_ISL_467491	GISAID	Africa	South Africa	2020-05-16
EPI_ISL_467493	GISAID	Africa	South Africa	2020-05-21
EPI_ISL_467495	GISAID	Africa	South Africa	2020-05-30
EPI_ISL_535484	GISAID	Africa	South Africa	2020-07-30
EPI_ISL_498104	GISAID	Africa	South Africa	2020-07-14
EPI_ISL_498110	GISAID	Africa	South Africa	2020-07-13
EPI_ISL_498112	GISAID	Africa	South Africa	2020-07-15
EPI_ISL_498116	GISAID	Africa	South Africa	2020-07-09
EPI_ISL_498123	GISAID	Africa	South Africa	2020-07-08
EPI_ISL_509307	GISAID	Africa	South Africa	2020-07-18
EPI_ISL_509316	GISAID	Africa	South Africa	2020-07-01
EPI_ISL_509329	GISAID	Africa	South Africa	2020-07-02
EPI_ISL_509333	GISAID	Africa	South Africa	2020-07-03
EPI_ISL_509349	GISAID	Africa	South Africa	2020-07-10
EPI_ISL_509360	GISAID	Africa	South Africa	2020-07-17
EPI_ISL_515653	GISAID	Africa	South Africa	2020-07-19
EPI_ISL_515658	GISAID	Africa	South Africa	2020-07-21
EPI_ISL_515859	GISAID	Africa	South Africa	2020-07-16
EPI_ISL_515871	GISAID	Africa	South Africa	2020-07-09
EPI_ISL_518045	GISAID	Africa	South Africa	2020-07-06
EPI_ISL_535445	GISAID	Africa	South Africa	2020-07-30
EPI_ISL_535447	GISAID	Africa	South Africa	2020-07-31
EPI_ISL_498079	GISAID	Africa	South Africa	2020-07-14
EPI_ISL_498089	GISAID	Africa	South Africa	2020-07-15
EPI_ISL_509258	GISAID	Africa	South Africa	2020-07-07
EPI_ISL_515681	GISAID	Africa	South Africa	2020-07-23
EPI_ISL_515689	GISAID	Africa	South Africa	2020-07-22
EPI_ISL_529748	GISAID	Africa	South Africa	2020-08-17
EPI_ISL_529720	GISAID	Africa	South Africa	2020-08-14
EPI_ISL_529721	GISAID	Africa	South Africa	2020-08-16
EPI_ISL_529723	GISAID	Africa	South Africa	2020-08-15
EPI_ISL_529724	GISAID	Africa	South Africa	2020-08-12
EPI_ISL_529737	GISAID	Africa	South Africa	2020-08-13
EPI_ISL_529740	GISAID	Africa	South Africa	2020-08-15
EPI_ISL_529742	GISAID	Africa	South Africa	2020-08-13
EPI_ISL_529752	GISAID	Africa	South Africa	2020-08-14
EPI_ISL_529759	GISAID	Africa	South Africa	2020-08-16
EPI_ISL_529769	GISAID	Africa	South Africa	2020-08-21
EPI_ISL_529775	GISAID	Africa	South Africa	2020-08-21
EPI_ISL_529782	GISAID	Africa	South Africa	2020-08-24
EPI_ISL_529790	GISAID	Africa	South Africa	2020-08-24
EPI_ISL_529797	GISAID	Africa	South Africa	2020-08-24
EPI_ISL_535390	GISAID	Africa	South Africa	2020-08-07
EPI_ISL_535399	GISAID	Africa	South Africa	2020-08-05
EPI_ISL_535448	GISAID	Africa	South Africa	2020-08-01
EPI_ISL_535449	GISAID	Africa	South Africa	2020-08-01
EPI_ISL_535480	GISAID	Africa	South Africa	2020-08-01
EPI_ISL_535505	GISAID	Africa	South Africa	2020-08-04
EPI_ISL_535512	GISAID	Africa	South Africa	2020-08-02
EPI_ISL_535513	GISAID	Africa	South Africa	2020-08-01
EPI_ISL_535514	GISAID	Africa	South Africa	2020-08-02
EPI_ISL_535526	GISAID	Africa	South Africa	2020-08-03
EPI_ISL_535539	GISAID	Africa	South Africa	2020-08-01
EPI_ISL_535544	GISAID	Africa	South Africa	2020-08-03
EPI_ISL_602639	GISAID	Africa	South Africa	2020-09-02
EPI_ISL_602642	GISAID	Africa	South Africa	2020-09-01
EPI_ISL_602652	GISAID	Africa	South Africa	2020-09-01
EPI_ISL_602658	GISAID	Africa	South Africa	2020-09-01
EPI_ISL_602665	GISAID	Africa	South Africa	2020-09-01
EPI_ISL_602689	GISAID	Africa	South Africa	2020-09-07
EPI_ISL_602693	GISAID	Africa	South Africa	2020-09-04
EPI_ISL_602695	GISAID	Africa	South Africa	2020-09-04
EPI_ISL_602701	GISAID	Africa	South Africa	2020-09-04
EPI_ISL_602708	GISAID	Africa	South Africa	2020-09-03
EPI_ISL_602713	GISAID	Africa	South Africa	2020-09-04
EPI_ISL_602718	GISAID	Africa	South Africa	2020-09-07
EPI_ISL_602726	GISAID	Africa	South Africa	2020-09-05
EPI_ISL_602731	GISAID	Africa	South Africa	2020-09-07
EPI_ISL_602736	GISAID	Africa	South Africa	2020-09-06
EPI_ISL_602738	GISAID	Africa	South Africa	2020-09-07
EPI_ISL_602740	GISAID	Africa	South Africa	2020-09-05
EPI_ISL_602744	GISAID	Africa	South Africa	2020-09-07
EPI_ISL_602750	GISAID	Africa	South Africa	2020-09-03
EPI_ISL_602754	GISAID	Africa	South Africa	2020-09-04
EPI_ISL_602757	GISAID	Africa	South Africa	2020-09-04
EPI_ISL_602760	GISAID	Africa	South Africa	2020-09-03
EPI_ISL_602762	GISAID	Africa	South Africa	2020-09-10
EPI_ISL_602767	GISAID	Africa	South Africa	2020-09-11
EPI_ISL_602772	GISAID	Africa	South Africa	2020-09-10
EPI_ISL_602782	GISAID	Africa	South Africa	2020-09-11
EPI_ISL_602785	GISAID	Africa	South Africa	2020-09-11
EPI_ISL_602790	GISAID	Africa	South Africa	2020-09-12
EPI_ISL_602795	GISAID	Africa	South Africa	2020-09-13
EPI_ISL_602798	GISAID	Africa	South Africa	2020-09-13
EPI_ISL_602804	GISAID	Africa	South Africa	2020-09-12
EPI_ISL_602811	GISAID	Africa	South Africa	2020-09-14
EPI_ISL_602814	GISAID	Africa	South Africa	2020-09-13
EPI_ISL_602820	GISAID	Africa	South Africa	2020-09-14
EPI_ISL_602824	GISAID	Africa	South Africa	2020-09-16
EPI_ISL_602833	GISAID	Africa	South Africa	2020-09-26
EPI_ISL_602838	GISAID	Africa	South Africa	2020-09-26
EPI_ISL_602841	GISAID	Africa	South Africa	2020-09-26
EPI_ISL_602854	GISAID	Africa	South Africa	2020-09-25
EPI_ISL_602862	GISAID	Africa	South Africa	2020-09-28
EPI_ISL_634984	GISAID	Africa	South Africa	2020-09-28
EPI_ISL_634986	GISAID	Africa	South Africa	2020-09-26
EPI_ISL_634989	GISAID	Africa	South Africa	2020-09-28
EPI_ISL_602884	GISAID	Africa	South Africa	2020-10-04
EPI_ISL_602890	GISAID	Africa	South Africa	2020-10-03
EPI_ISL_602896	GISAID	Africa	South Africa	2020-10-07
EPI_ISL_602908	GISAID	Africa	South Africa	2020-10-06
EPI_ISL_605790	GISAID	Africa	South Africa	2020-10-01
EPI_ISL_634994	GISAID	Africa	South Africa	2020-10-11
EPI_ISL_634995	GISAID	Africa	South Africa	2020-10-09
EPI_ISL_634998	GISAID	Africa	South Africa	2020-10-10
EPI_ISL_635002	GISAID	Africa	South Africa	2020-10-12
EPI_ISL_635004	GISAID	Africa	South Africa	2020-10-13
EPI_ISL_635009	GISAID	Africa	South Africa	2020-10-14
EPI_ISL_635014	GISAID	Africa	South Africa	2020-10-12
EPI_ISL_635017	GISAID	Africa	South Africa	2020-10-14
EPI_ISL_635021	GISAID	Africa	South Africa	2020-10-16
EPI_ISL_635030	GISAID	Africa	South Africa	2020-10-19
EPI_ISL_635032	GISAID	Africa	South Africa	2020-10-18
EPI_ISL_635037	GISAID	Africa	South Africa	2020-10-18
EPI_ISL_635040	GISAID	Africa	South Africa	2020-10-18
EPI_ISL_635048	GISAID	Africa	South Africa	2020-10-20
EPI_ISL_635051	GISAID	Africa	South Africa	2020-10-20
EPI_ISL_635056	GISAID	Africa	South Africa	2020-10-19
EPI_ISL_635058	GISAID	Africa	South Africa	2020-10-19
EPI_ISL_635024	GISAID	Africa	South Africa	2020-10-15
EPI_ISL_614347	GISAID	Africa	Ivory Coast	2020-09-22
EPI_ISL_614393	GISAID	Africa	Ivory Coast	2020-09-04
MT291826	NCBI	Asia	China	2019-12-30
MT019530	NCBI	Asia	China	2019-12-30
MT019529	NCBI	Asia	China	2019-12-23
MN996531	NCBI	Asia	China	2019-12-30
MN996529	NCBI	Asia	China	2019-12-30
MN996527	NCBI	Asia	China	2019-12-30
MT291828	NCBI	Asia	China	2019-12-30
MT019531	NCBI	Asia	China	2019-12-30
MT291829	NCBI	Asia	China	2019-12-30
MT291827	NCBI	Asia	China	2019-12-30
MT291830	NCBI	Asia	China	2019-12-30
MT019532	NCBI	Asia	China	2019-12-30
MN996528	NCBI	Asia	China	2019-12-30
MN996530	NCBI	Asia	China	2019-12-30
ref|NC_045512	NCBI	Asia	China	2019/12
MT226610	NCBI	Asia	China	2020-01-20
MT407653	NCBI	Asia	China	2020-01-26
MT291836	NCBI	Asia	China	2020-01-29
MT079845	NCBI	Asia	China	2020-01-22
MT049951	NCBI	Asia	China	2020-01-17
MT291834	NCBI	Asia	China	2020-01-28
MT135043	NCBI	Asia	China	2020-01-28
MT291832	NCBI	Asia	China	2020-01-25
MT135042	NCBI	Asia	China	2020-01-28
MT135044	NCBI	Asia	China	2020-01-28
MT135041	NCBI	Asia	China	2020-01-26
MT291833	NCBI	Asia	China	2020-01-28
MT079853	NCBI	Asia	China	2020-01-22
MT079843	NCBI	Asia	China	2020-01-22
MT079844	NCBI	Asia	China	2020-01-22
MT079846	NCBI	Asia	China	2020-01-22
MT079850	NCBI	Asia	China	2020-01-22
MN975262	NCBI	Asia	China	2020-01-11
MT291831	NCBI	Asia	China	2020-01-24
MT123292	NCBI	Asia	China	2020-01-27
MT079849	NCBI	Asia	China	2020-01-22
MT079847	NCBI	Asia	China	2020-01-22
MT407651	NCBI	Asia	China	2020-01-22
MT407650	NCBI	Asia	China	2020-01-22
MN938384	NCBI	Asia	China	2020-01-10
MT407649	NCBI	Asia	China	2020-01-22
MT079851	NCBI	Asia	China	2020-01-22
MT079852	NCBI	Asia	China	2020-01-22
MT079848	NCBI	Asia	China	2020-01-22
MT123291	NCBI	Asia	China	2020-01-29
MT123293	NCBI	Asia	China	2020-01-29
MT259226	NCBI	Asia	China	2020-01-10
MT259227	NCBI	Asia	China	2020-01-26
MT407652	NCBI	Asia	China	2020-01-26
MT079854	NCBI	Asia	China	2020-01-22
MT534630	NCBI	Asia	China	2020-01-26
MT291835	NCBI	Asia	China	2020-01-27
MT093631	NCBI	Asia	China	2020-01-08
MT259231	NCBI	Asia	China	2020-01-25
MT259229	NCBI	Asia	China	2020-01-26
MT259230	NCBI	Asia	China	2020-01-25
MT259228	NCBI	Asia	China	2020-01-26
MT019533	NCBI	Asia	China	2020-01-01
MT039873	NCBI	Asia	China	2020-01-20
MN988669	NCBI	Asia	China	2020-01-02
MN988668	NCBI	Asia	China	2020-01-02
MT253705	NCBI	Asia	China	2020-01-22
MT253697	NCBI	Asia	China	2020-01-23
MT253709	NCBI	Asia	China	2020-01-21
MT253710	NCBI	Asia	China	2020-01-21
MT253699	NCBI	Asia	China	2020-01-24
MT253707	NCBI	Asia	China	2020-01-25
MT253704	NCBI	Asia	China	2020-01-25
MT253702	NCBI	Asia	China	2020-01-21
MT253703	NCBI	Asia	China	2020-01-25
MT253708	NCBI	Asia	China	2020-01-21
MT253696	NCBI	Asia	China	2020-01-23
MT253701	NCBI	Asia	China	2020-01-21
MT253700	NCBI	Asia	China	2020-01-25
MT253698	NCBI	Asia	China	2020-01-23
MT039874	NCBI	Asia	China	2020-01-22
MT412134	NCBI	Asia	China	2020-02-24
MT568638	NCBI	Asia	China	2020-02-25
MT568639	NCBI	Asia	China	2020-02-25
MT568640	NCBI	Asia	China	2020-02-25
MT568635	NCBI	Asia	China	2020-02-25
MT568641	NCBI	Asia	China	2020-02-25
MT510727	NCBI	Asia	China	2020-02-15
MT510728	NCBI	Asia	China	2020-02-13
MT446312	NCBI	Asia	China	2020-02-05
MT568636	NCBI	Asia	China	2020-02-27
MT568634	NCBI	Asia	China	2020-02-25
MT568637	NCBI	Asia	China	2020-02-25
MT123290	NCBI	Asia	China	2020-02-05
MT121215	NCBI	Asia	China	2020-02-02
MT407658	NCBI	Asia	China	2020-03-24
MT281577	NCBI	Asia	China	2020-03-10
MT407655	NCBI	Asia	China	2020-03-24
MT407654	NCBI	Asia	China	2020-03-24
MT396241	NCBI	Asia	China	2020-03-06
MT407657	NCBI	Asia	China	2020-03-24
MT407656	NCBI	Asia	China	2020-03-24
MT407659	NCBI	Asia	China	2020-03-24
EPI_ISL_591270	GISAID	Asia	Qingdao	2020-09-24
EPI_ISL_591271	GISAID	Asia	Qingdao	2020-09-24
EPI_ISL_591277	GISAID	Asia	Qingdao	2020-09-24
MT230904	NCBI	Asia	Hong Kong	2020-01-22
MT365032	NCBI	Asia	Hong Kong	2020-01-30
MT114416	NCBI	Asia	Hong Kong	2020-01-27
MT114417	NCBI	Asia	Hong Kong	2020-01-29
MT186683	NCBI	Asia	Hong Kong	2020/01
MT365030	NCBI	Asia	Hong Kong	2020-01-31
MT114419	NCBI	Asia	Hong Kong	2020-01-29
MT114418	NCBI	Asia	Hong Kong	2020-01-27
MT114413	NCBI	Asia	Hong Kong	2020-01-24
MT114412	NCBI	Asia	Hong Kong	2020-01-23
MT365029	NCBI	Asia	Hong Kong	2020-01-30
MT114415	NCBI	Asia	Hong Kong	2020-01-27
MT114414	NCBI	Asia	Hong Kong	2020-01-24
MT365028	NCBI	Asia	Hong Kong	2020-01-24
MT215194	NCBI	Asia	Hong Kong	2020-02-24
MT215195	NCBI	Asia	Hong Kong	2020-02-25
MT365031	NCBI	Asia	Hong Kong	2020-02-02
MT276600	NCBI	Asia	Hong Kong	2020-03-08
MT270814	NCBI	Asia	Hong Kong	2020-03-18
MT270815	NCBI	Asia	Hong Kong	2020-03-16
EPI_ISL_516799	GISAID	Asia	Hong Kong	2020-08-17
EPI_ISL_539817	GISAID	Asia	Hong Kong	2020-08-14
EPI_ISL_539819	GISAID	Asia	Hong Kong	2020-08-13
EPI_ISL_539822	GISAID	Asia	Hong Kong	2020-08-14
EPI_ISL_610201	GISAID	Asia	Hong Kong	2020-10-07
EPI_ISL_610202	GISAID	Asia	Hong Kong	2020-10-07
EPI_ISL_610204	GISAID	Asia	Hong Kong	2020-10-01
EPI_ISL_610215	GISAID	Asia	Hong Kong	2020-10-02
EPI_ISL_610225	GISAID	Asia	Hong Kong	2020-10-11
EPI_ISL_516812	GISAID	Asia	Singapore	2020-08-11
EPI_ISL_516815	GISAID	Asia	Singapore	2020-08-11
EPI_ISL_516824	GISAID	Asia	Singapore	2020-08-11
EPI_ISL_536423	GISAID	Asia	Singapore	2020-08-11
EPI_ISL_583898	GISAID	Asia	Singapore	2020-08-11
EPI_ISL_527364	GISAID	Asia	Singapore	2020-08-11
EPI_ISL_536442	GISAID	Asia	Singapore	2020-09-04
EPI_ISL_548972	GISAID	Asia	Singapore	2020-09-14
EPI_ISL_583893	GISAID	Asia	Singapore	2020-09-25
EPI_ISL_596458	GISAID	Asia	Singapore	2020-10-05
EPI_ISL_596460	GISAID	Asia	Singapore	2020-10-05
EPI_ISL_596466	GISAID	Asia	Singapore	2020-10-05
EPI_ISL_596489	GISAID	Asia	Singapore	2020-10-16
EPI_ISL_605819	GISAID	Asia	Singapore	2020-10-25
EPI_ISL_626631	GISAID	Asia	Singapore	2020-10-19
MT039890	NCBI	Asia	South Korea	2020/01
MT304475	NCBI	Asia	South Korea	2020-02-29
MT304474	NCBI	Asia	South Korea	2020-02-27
MT304476	NCBI	Asia	South Korea	2020-02-29
EPI_ISL_526746	GISAID	Asia	South Korea	2020-08-11
EPI_ISL_568573	GISAID	Asia	Japan	2020-08-18
EPI_ISL_568575	GISAID	Asia	Japan	2020-08-11
EPI_ISL_568576	GISAID	Asia	Japan	2020-08-15
EPI_ISL_512922	GISAID	Asia	SaudiArabia	2020-08-04
EPI_ISL_512927	GISAID	Asia	SaudiArabia	2020-08-04
EPI_ISL_582650	GISAID	Asia	United Arab Emirates	2020-08-29
MT276597	NCBI	Asia	Israel	2020/02
MT276598	NCBI	Asia	Israel	2020/03
EPI_ISL_575332	GISAID	Asia	Israel	2020-09-01
EPI_ISL_575333	GISAID	Asia	Israel	2020-09-01
EPI_ISL_575334	GISAID	Asia	Israel	2020-09-01
MT447177	NCBI	Asia	Iran	2020-03-26
MT320891	NCBI	Asia	Iran	2020-03-09
MT428554	NCBI	Asia	Kazakhstan	2020-03-20
MT428551	NCBI	Asia	Kazakhstan	2020-03-20
MT428552	NCBI	Asia	Kazakhstan	2020-03-20
MT428553	NCBI	Asia	Kazakhstan	2020-03-20
MT240479	NCBI	Asia	Pakistan	2020-03-04
MT500122	NCBI	Asia	Pakistan	2020-03-16
EPI_ISL_636334	GISAID	Asia	Jordan	2020-10-03
EPI_ISL_636342	GISAID	Asia	Jordan	2020-10-02
EPI_ISL_636346	GISAID	Asia	Jordan	2020-10-03
EPI_ISL_636351	GISAID	Asia	Jordan	2020-10-03
EPI_ISL_636356	GISAID	Asia	Jordan	2020-10-02
EPI_ISL_636359	GISAID	Asia	Jordan	2020-10-03
EPI_ISL_636364	GISAID	Asia	Jordan	2020-10-03
EPI_ISL_636365	GISAID	Asia	Jordan	2020-10-03
EPI_ISL_636374	GISAID	Asia	Jordan	2020-10-03
EPI_ISL_636378	GISAID	Asia	Jordan	2020-10-03
EPI_ISL_636385	GISAID	Asia	Jordan	2020-10-02
EPI_ISL_636393	GISAID	Asia	Jordan	2020-10-03
EPI_ISL_636402	GISAID	Asia	Jordan	2020-10-03
EPI_ISL_636407	GISAID	Asia	Jordan	2020-10-03
EPI_ISL_636413	GISAID	Asia	Jordan	2020-10-03
EPI_ISL_636420	GISAID	Asia	Jordan	2020-10-03
EPI_ISL_636425	GISAID	Asia	Jordan	2020-10-03
EPI_ISL_636433	GISAID	Asia	Jordan	2020-10-03
EPI_ISL_636437	GISAID	Asia	Jordan	2020-10-03
EPI_ISL_636442	GISAID	Asia	Jordan	2020-10-03
EPI_ISL_636451	GISAID	Asia	Jordan	2020-10-03
EPI_ISL_636456	GISAID	Asia	Jordan	2020-10-03
MT327745	NCBI	Asia	Turkey	2020-03-17
MT605818	NCBI	Asia	Turkey	2020-04-16
MT560531	NCBI	Asia	Turkey	2020-04-16
MT560525	NCBI	Asia	Turkey	2020-04-16
MT560530	NCBI	Asia	Turkey	2020-04-15
MT787487	NCBI	Asia	Turkey	2020-07-15
MT787503	NCBI	Asia	Turkey	2020-07-15
MT787553	NCBI	Asia	Turkey	2020-07-15
MT787558	NCBI	Asia	Turkey	2020-07-15
MT786327	NCBI	Asia	Turkey	2020-07-15
MT371047	NCBI	Asia	Sri Lanka	2020-03-16
MT371049	NCBI	Asia	Sri Lanka	2020-03-19
MT371048	NCBI	Asia	Sri Lanka	2020-03-10
MT371050	NCBI	Asia	Sri Lanka	2020-03-31
MT072688	NCBI	Asia	Nepal	2020-01-13
MT372481	NCBI	Asia	Malaysia	2020-03-20
MT372480	NCBI	Asia	Malaysia	2020-03-18
MT447158	NCBI	Asia	Thailand	2020-01-25
MT447166	NCBI	Asia	Thailand	2020-01-23
MT447156	NCBI	Asia	Thailand	2020-01-23
MT447159	NCBI	Asia	Thailand	2020-01-26
MT447157	NCBI	Asia	Thailand	2020-01-25
MT447155	NCBI	Asia	Thailand	2020-01-08
MT447162	NCBI	Asia	Thailand	2020-02-07
MT447165	NCBI	Asia	Thailand	2020-02-25
MT447161	NCBI	Asia	Thailand	2020-02-03
MT447154	NCBI	Asia	Thailand	2020-02-01
MT447163	NCBI	Asia	Thailand	2020-02-22
MT447171	NCBI	Asia	Thailand	2020-03-16
MT447174	NCBI	Asia	Thailand	2020-03-01
MT447175	NCBI	Asia	Thailand	2020-03-19
MT447176	NCBI	Asia	Thailand	2020-03-20
MT447169	NCBI	Asia	Thailand	2020-03-12
MT447173	NCBI	Asia	Thailand	2020-03-18
MT447172	NCBI	Asia	Thailand	2020-03-18
MT192759	NCBI	Asia	Taiwan	2020-01-25
MT066175	NCBI	Asia	Taiwan	2020-01-31
MT066176	NCBI	Asia	Taiwan	2020-02-05
MT479223	NCBI	Asia	Taiwan	2020-02-29
MT370516	NCBI	Asia	Taiwan	2020-02-26
MT370518	NCBI	Asia	Taiwan	2020-02-27
MT590598	NCBI	Asia	Taiwan	2020-03-17
MT374105	NCBI	Asia	Taiwan	2020-03-13
MT374107	NCBI	Asia	Taiwan	2020-03-14
MT374106	NCBI	Asia	Taiwan	2020-03-13
MT374102	NCBI	Asia	Taiwan	2020-03-05
MT374104	NCBI	Asia	Taiwan	2020-03-10
MT374103	NCBI	Asia	Taiwan	2020-03-09
MT374111	NCBI	Asia	Taiwan	2020-03-17
MT479227	NCBI	Asia	Taiwan	2020-03-20
MT374112	NCBI	Asia	Taiwan	2020-03-16
MT374113	NCBI	Asia	Taiwan	2020-03-17
MT374110	NCBI	Asia	Taiwan	2020-03-17
MT374115	NCBI	Asia	Taiwan	2020-03-18
MT479225	NCBI	Asia	Taiwan	2020-03-21
MT479226	NCBI	Asia	Taiwan	2020-03-20
MT374109	NCBI	Asia	Taiwan	2020-03-17
MT374114	NCBI	Asia	Taiwan	2020-03-18
MT374116	NCBI	Asia	Taiwan	2020-03-18
MT374108	NCBI	Asia	Taiwan	2020-03-14
MT590599	NCBI	Asia	Taiwan	2020-04-02
MT517437	NCBI	Asia	Taiwan	2020-04-19
MT517436	NCBI	Asia	Taiwan	2020-04-19
MT590600	NCBI	Asia	Taiwan	2020-04-11
EPI_ISL_534336	GISAID	Asia	Taiwan	2020-08-11
MT192773	NCBI	Asia	Vietnam	2020-01-22
MT192772	NCBI	Asia	Vietnam	2020-01-22
MT577359	NCBI	Asia	Bangladesh	2020-04-25
MT566437	NCBI	Asia	Bangladesh	2020-04-28
MT566435	NCBI	Asia	Bangladesh	2020-04-28
MT566436	NCBI	Asia	Bangladesh	2020-04-28
MT476385	NCBI	Asia	Bangladesh	2020-04-18
MT502774	NCBI	Asia	Bangladesh	2020-05-13
MT601281	NCBI	Asia	Bangladesh	2020-05-26
MT601283	NCBI	Asia	Bangladesh	2020-05-26
MT601282	NCBI	Asia	Bangladesh	2020-05-26
MT509958	NCBI	Asia	Bangladesh	2020-05-11
MT576689	NCBI	Asia	Bangladesh	2020-05-23
MT601279	NCBI	Asia	Bangladesh	2020-05-10
MT576643	NCBI	Asia	Bangladesh	2020-05-23
MT601284	NCBI	Asia	Bangladesh	2020-05-26
MT576639	NCBI	Asia	Bangladesh	2020-05-21
MT539159	NCBI	Asia	Bangladesh	2020-05-21
MT578017	NCBI	Asia	Bangladesh	2020-05-23
MT607252	NCBI	Asia	Bangladesh	2020-05-10
MT601280	NCBI	Asia	Bangladesh	2020-05-10
MT607255	NCBI	Asia	Bangladesh	2020-05-10
MT539160	NCBI	Asia	Bangladesh	2020-05-21
MT576644	NCBI	Asia	Bangladesh	2020-05-23
MT601295	NCBI	Asia	Bangladesh	2020-05-09
MT601278	NCBI	Asia	Bangladesh	2020-05-10
MT607253	NCBI	Asia	Bangladesh	2020-05-31
MT576642	NCBI	Asia	Bangladesh	2020-05-23
MT576641	NCBI	Asia	Bangladesh	2020-05-23
MT601275	NCBI	Asia	Bangladesh	2020-05-07
MT539158	NCBI	Asia	Bangladesh	2020-05-21
MT607246	NCBI	Asia	Bangladesh	2020-05-09
MT607254	NCBI	Asia	Bangladesh	2020-05-07
MT576640	NCBI	Asia	Bangladesh	2020-05-23
MT578016	NCBI	Asia	Bangladesh	2020-05-23
MT607248	NCBI	Asia	Bangladesh	2020-06-01
MT601291	NCBI	Asia	Bangladesh	2020-06-01
MT601290	NCBI	Asia	Bangladesh	2020-06-01
MT601294	NCBI	Asia	Bangladesh	2020-06-01
MT601292	NCBI	Asia	Bangladesh	2020-06-01
MT601293	NCBI	Asia	Bangladesh	2020-06-01
MT601276	NCBI	Asia	Bangladesh	2020-06-01
MT601289	NCBI	Asia	Bangladesh	2020-06-01
MT601277	NCBI	Asia	Bangladesh	2020-06-01
MT601287	NCBI	Asia	Bangladesh	2020-06-01
MT601286	NCBI	Asia	Bangladesh	2020-06-01
MT601285	NCBI	Asia	Bangladesh	2020-06-01
MT607245	NCBI	Asia	Bangladesh	2020-06-01
MT601288	NCBI	Asia	Bangladesh	2020-06-01
MT607247	NCBI	Asia	Bangladesh	2020-06-01
MT876525	NCBI	Asia	Bangladesh	2020-07-07
MT876527	NCBI	Asia	Bangladesh	2020-07-19
MT876548	NCBI	Asia	Bangladesh	2020-07-07
MT876555	NCBI	Asia	Bangladesh	2020-07-07
MT876599	NCBI	Asia	Bangladesh	2020-07-21
MT876607	NCBI	Asia	Bangladesh	2020-07-18
MT856454	NCBI	Asia	Bangladesh	2020-07-18
MT846011	NCBI	Asia	Bangladesh	2020-07-15
MT846015	NCBI	Asia	Bangladesh	2020-07-15
MT847208	NCBI	Asia	Bangladesh	2020-07-15
MT847216	NCBI	Asia	Bangladesh	2020-07-14
MT847218	NCBI	Asia	Bangladesh	2020-07-19
MT847220	NCBI	Asia	Bangladesh	2020-07-21
MT847221	NCBI	Asia	Bangladesh	2020-07-21
MT847222	NCBI	Asia	Bangladesh	2020-07-14
MT847226	NCBI	Asia	Bangladesh	2020-07-18
MT762396	NCBI	Asia	Bangladesh	2020-07-07
MT762942	NCBI	Asia	Bangladesh	2020-07-07
MT762943	NCBI	Asia	Bangladesh	2020-07-07
MT755831	NCBI	Asia	Bangladesh	2020-07-06
MT755835	NCBI	Asia	Bangladesh	2020-07-06
MT755837	NCBI	Asia	Bangladesh	2020-07-06
MT755857	NCBI	Asia	Bangladesh	2020-07-06
MT755858	NCBI	Asia	Bangladesh	2020-07-06
MT755900	NCBI	Asia	Bangladesh	2020-07-06
MT755917	NCBI	Asia	Bangladesh	2020-07-06
EPI_ISL_603239	GISAID	Asia	Bangladesh	2020-10-08
EPI_ISL_603241	GISAID	Asia	Bangladesh	2020-10-18
EPI_ISL_603242	GISAID	Asia	Bangladesh	2020-10-10
EPI_ISL_603243	GISAID	Asia	Bangladesh	2020-10-10
EPI_ISL_603244	GISAID	Asia	Bangladesh	2020-10-10
EPI_ISL_603246	GISAID	Asia	Bangladesh	2020-10-05
EPI_ISL_603247	GISAID	Asia	Bangladesh	2020-10-05
MT919779	NCBI	Asia	Philippines	2020-07-10
MT919787	NCBI	Asia	Philippines	2020-07-18
MT919790	NCBI	Asia	Philippines	2020-07-18
EPI_ISL_516829	GISAID	Asia	Indonesia	2020-08-10
EPI_ISL_538510	GISAID	Asia	Indonesia	2020-08-06
EPI_ISL_538509	GISAID	Asia	Indonesia	2020-08-20
EPI_ISL_576128	GISAID	Asia	Indonesia	2020-08-21
EPI_ISL_528753	GISAID	Asia	Indonesia	2020-08-04
EPI_ISL_576383	GISAID	Asia	Indonesia	2020-09-01
MT050493	NCBI	Asia	India	2020-01-31
MT012098	NCBI	Asia	India	2020-01-27
MT477885	NCBI	Asia	India	2020-03-25
MT457403	NCBI	Asia	India	2020-03-25
MT415321	NCBI	Asia	India	2020-03-11
MT415323	NCBI	Asia	India	2020-03-20
MT451890	NCBI	Asia	India	2020-04-26
MT451889	NCBI	Asia	India	2020-04-26
MT451880	NCBI	Asia	India	2020-04-26
MT539174	NCBI	Asia	India	2020-04-27
MT576034	NCBI	Asia	India	2020-04-27
MT467252	NCBI	Asia	India	2020-04-29
MT467247	NCBI	Asia	India	2020-04-29
MT467241	NCBI	Asia	India	2020-04-26
MT435084	NCBI	Asia	India	2020-04-14
MT358637	NCBI	Asia	India	2020-04-05
MT467238	NCBI	Asia	India	2020-04-29
MT435083	NCBI	Asia	India	2020-04-07
MT576038	NCBI	Asia	India	2020-04-27
MT467249	NCBI	Asia	India	2020-04-29
MT467242	NCBI	Asia	India	2020-04-29
MT481900	NCBI	Asia	India	2020-04-28
MT435080	NCBI	Asia	India	2020-04-13
MT481904	NCBI	Asia	India	2020-04-25
MT467244	NCBI	Asia	India	2020-04-30
MT451884	NCBI	Asia	India	2020-04-26
MT467250	NCBI	Asia	India	2020-04-29
MT496973	NCBI	Asia	India	2020-04-29
MT467257	NCBI	Asia	India	2020-04-30
MT496990	NCBI	Asia	India	2020-04-29
MT481907	NCBI	Asia	India	2020-04-26
MT467255	NCBI	Asia	India	2020-04-30
MT451876	NCBI	Asia	India	2020-04-26
MT496997	NCBI	Asia	India	2020-04-29
MT509505	NCBI	Asia	India	2020-04-11
MT435081	NCBI	Asia	India	2020-04-13
MT467251	NCBI	Asia	India	2020-04-29
MT496972	NCBI	Asia	India	2020-04-29
MT451885	NCBI	Asia	India	2020-04-26
MT496975	NCBI	Asia	India	2020-04-29
MT509509	NCBI	Asia	India	2020-04-11
MT467237	NCBI	Asia	India	2020-04-26
MT467246	NCBI	Asia	India	2020-04-29
MT481908	NCBI	Asia	India	2020-04-28
MT451888	NCBI	Asia	India	2020-04-26
MT496991	NCBI	Asia	India	2020-04-27
MT451881	NCBI	Asia	India	2020-04-26
MT451882	NCBI	Asia	India	2020-04-26
MT467254	NCBI	Asia	India	2020-04-29
MT467243	NCBI	Asia	India	2020-04-30
MT496974	NCBI	Asia	India	2020-04-29
MT467253	NCBI	Asia	India	2020-04-29
MT496993	NCBI	Asia	India	2020-04-29
MT481901	NCBI	Asia	India	2020-04-28
MT496994	NCBI	Asia	India	2020-04-29
MT496995	NCBI	Asia	India	2020-04-29
MT435085	NCBI	Asia	India	2020-04-22
MT481906	NCBI	Asia	India	2020-04-27
MT467258	NCBI	Asia	India	2020-04-29
MT467256	NCBI	Asia	India	2020-04-29
MT467245	NCBI	Asia	India	2020-04-29
MT467248	NCBI	Asia	India	2020-04-29
MT496979	NCBI	Asia	India	2020-05-05
MT509497	NCBI	Asia	India	2020-05-11
MT509657	NCBI	Asia	India	2020-05-03
MT560705	NCBI	Asia	India	2020-05-17
MT509504	NCBI	Asia	India	2020-05-06
MT576530	NCBI	Asia	India	2020-05-24
MT509501	NCBI	Asia	India	2020-05-06
MT509503	NCBI	Asia	India	2020-05-09
MT496976	NCBI	Asia	India	2020-05-03
MT576031	NCBI	Asia	India	2020-05-27
MT576040	NCBI	Asia	India	2020-05-27
MT576055	NCBI	Asia	India	2020-05-27
MT576041	NCBI	Asia	India	2020-05-27
MT576049	NCBI	Asia	India	2020-05-27
MT509494	NCBI	Asia	India	2020-05-03
MT576053	NCBI	Asia	India	2020-05-27
MT576059	NCBI	Asia	India	2020-05-27
MT576032	NCBI	Asia	India	2020-05-27
MT576047	NCBI	Asia	India	2020-05-27
MT576046	NCBI	Asia	India	2020-05-27
MT560677	NCBI	Asia	India	2020-05-16
MT576042	NCBI	Asia	India	2020-05-27
MT576035	NCBI	Asia	India	2020-05-02
MT576037	NCBI	Asia	India	2020-05-02
MT496996	NCBI	Asia	India	2020-05-02
MT496989	NCBI	Asia	India	2020-05-03
MT539176	NCBI	Asia	India	2020-05-02
MT539166	NCBI	Asia	India	2020-05-02
MT509649	NCBI	Asia	India	2020-05-02
MT481902	NCBI	Asia	India	2020-05-03
MT481903	NCBI	Asia	India	2020-05-03
MT467260	NCBI	Asia	India	2020-05-02
MT483559	NCBI	Asia	India	2020-05-05
MT483553	NCBI	Asia	India	2020-05-05
MT560673	NCBI	Asia	India	2020-05-06
MT560827	NCBI	Asia	India	2020-05-06
MT560669	NCBI	Asia	India	2020-05-16
MT560675	NCBI	Asia	India	2020-05-16
MT509650	NCBI	Asia	India	2020-05-02
MT539169	NCBI	Asia	India	2020-05-02
MT539172	NCBI	Asia	India	2020-05-02
MT539168	NCBI	Asia	India	2020-05-02
MT539165	NCBI	Asia	India	2020-05-02
MT509656	NCBI	Asia	India	2020-05-03
MT539171	NCBI	Asia	India	2020-05-02
MT576052	NCBI	Asia	India	2020-05-27
MT576045	NCBI	Asia	India	2020-05-27
MT496977	NCBI	Asia	India	2020-05-03
MT481905	NCBI	Asia	India	2020-05-02
MT481896	NCBI	Asia	India	2020-05-03
MT576054	NCBI	Asia	India	2020-05-27
MT560682	NCBI	Asia	India	2020-05-24
MT496988	NCBI	Asia	India	2020-05-03
MT576039	NCBI	Asia	India	2020-05-02
MT539173	NCBI	Asia	India	2020-05-02
MT539167	NCBI	Asia	India	2020-05-02
MT483555	NCBI	Asia	India	2020-05-05
MT483557	NCBI	Asia	India	2020-05-05
MT483560	NCBI	Asia	India	2020-05-05
MT483556	NCBI	Asia	India	2020-05-05
MT481897	NCBI	Asia	India	2020-05-05
MT481899	NCBI	Asia	India	2020-05-05
MT483558	NCBI	Asia	India	2020-05-05
MT483554	NCBI	Asia	India	2020-05-05
MT496984	NCBI	Asia	India	2020-05-03
MT539164	NCBI	Asia	India	2020-05-02
MT539175	NCBI	Asia	India	2020-05-02
MT467259	NCBI	Asia	India	2020-05-02
MT560672	NCBI	Asia	India	2020-05-24
MT560690	NCBI	Asia	India	2020-05-24
MT560657	NCBI	Asia	India	2020-05-24
MT509659	NCBI	Asia	India	2020-05-03
MT576048	NCBI	Asia	India	2020-05-27
MT560679	NCBI	Asia	India	2020-05-24
MT576058	NCBI	Asia	India	2020-05-27
MT576056	NCBI	Asia	India	2020-05-27
MT560667	NCBI	Asia	India	2020-05-24
MT560674	NCBI	Asia	India	2020-05-24
MT594112	NCBI	Asia	India	2020-05-27
MT576044	NCBI	Asia	India	2020-05-27
MT576057	NCBI	Asia	India	2020-05-27
MT560680	NCBI	Asia	India	2020-05-24
MT481895	NCBI	Asia	India	2020-05-03
MT496987	NCBI	Asia	India	2020-05-04
MT560656	NCBI	Asia	India	2020-05-24
MT576043	NCBI	Asia	India	2020-05-27
MT496986	NCBI	Asia	India	2020-05-05
MT467263	NCBI	Asia	India	2020-05-04
MT509502	NCBI	Asia	India	2020-05-10
MT576532	NCBI	Asia	India	2020-05-18
MT496980	NCBI	Asia	India	2020-05-03
MT576529	NCBI	Asia	India	2020-05-18
MT509498	NCBI	Asia	India	2020-05-09
MT509499	NCBI	Asia	India	2020-05-07
MT509508	NCBI	Asia	India	2020-05-05
MT496983	NCBI	Asia	India	2020-05-05
MT481898	NCBI	Asia	India	2020-05-05
MT496985	NCBI	Asia	India	2020-05-05
MT560689	NCBI	Asia	India	2020-05-05
MT576033	NCBI	Asia	India	2020-05-27
MT576060	NCBI	Asia	India	2020-05-27
MT560704	NCBI	Asia	India	2020-05-24
MT560693	NCBI	Asia	India	2020-05-24
MT509651	NCBI	Asia	India	2020-05-03
MT560668	NCBI	Asia	India	2020-05-24
MT496982	NCBI	Asia	India	2020-05-03
MT496992	NCBI	Asia	India	2020-05-03
MT576061	NCBI	Asia	India	2020-05-27
MT576531	NCBI	Asia	India	2020-05-24
MT560692	NCBI	Asia	India	2020-05-24
MT560670	NCBI	Asia	India	2020-05-24
MT560671	NCBI	Asia	India	2020-05-24
MT509507	NCBI	Asia	India	2020-05-10
MT509510	NCBI	Asia	India	2020-05-10
MT608648	NCBI	Asia	India	2020-06-03
MT607610	NCBI	Asia	India	2020-06-05
MT607607	NCBI	Asia	India	2020-06-03
MT607604	NCBI	Asia	India	2020-06-03
MT607244	NCBI	Asia	India	2020-06-05
MT607250	NCBI	Asia	India	2020-06-05
MT607603	NCBI	Asia	India	2020-06-03
MT607620	NCBI	Asia	India	2020-06-03
MT607616	NCBI	Asia	India	2020-06-05
MT607606	NCBI	Asia	India	2020-06-03
MT607613	NCBI	Asia	India	2020-06-05
MT607249	NCBI	Asia	India	2020-06-05
MT607615	NCBI	Asia	India	2020-06-05
MT607601	NCBI	Asia	India	2020-06-05
MT607621	NCBI	Asia	India	2020-06-03
MT607251	NCBI	Asia	India	2020-06-05
MT607619	NCBI	Asia	India	2020-06-03
MT607618	NCBI	Asia	India	2020-06-05
MT607612	NCBI	Asia	India	2020-06-05
MT607608	NCBI	Asia	India	2020-06-03
MT607611	NCBI	Asia	India	2020-06-03
MT607605	NCBI	Asia	India	2020-06-03
MT607617	NCBI	Asia	India	2020-06-03
MT607602	NCBI	Asia	India	2020-06-05
MT607614	NCBI	Asia	India	2020-06-03
MT607609	NCBI	Asia	India	2020-06-03
MT953890	NCBI	Asia	India	2020-07-06
MT954060	NCBI	Asia	India	2020-07-11
MT954069	NCBI	Asia	India	2020-07-06
MT954414	NCBI	Asia	India	2020-07-06
MT954593	NCBI	Asia	India	2020-07-06
MT955347	NCBI	Asia	India	2020-07-06
MT940460	NCBI	Asia	India	2020-07-27
MT940461	NCBI	Asia	India	2020-07-27
MT940464	NCBI	Asia	India	2020-07-27
MT940476	NCBI	Asia	India	2020-07-06
EPI_ISL_569863	GISAID	Asia	India	2020-08-12
EPI_ISL_581501	GISAID	Asia	India	2020-08-12
EPI_ISL_581497	GISAID	Asia	India	2020-08-04
EPI_ISL_539701	GISAID	Asia	India	2020-08-14
EPI_ISL_539710	GISAID	Asia	India	2020-08-14
EPI_ISL_539720	GISAID	Asia	India	2020-08-09
EPI_ISL_539727	GISAID	Asia	India	2020-08-19
EPI_ISL_539733	GISAID	Asia	India	2020-08-12
EPI_ISL_539623	GISAID	Asia	India	2020-08-09
EPI_ISL_539673	GISAID	Asia	India	2020-08-19
EPI_ISL_539690	GISAID	Asia	India	2020-08-11
EPI_ISL_541714	GISAID	Asia	India	2020-08-21
EPI_ISL_577660	GISAID	Asia	India	2020-09-18
EPI_ISL_577664	GISAID	Asia	India	2020-09-17
EPI_ISL_577609	GISAID	Asia	India	2020-09-28
EPI_ISL_586569	GISAID	Asia	India	2020-09-03
EPI_ISL_586570	GISAID	Asia	India	2020-09-01
EPI_ISL_569860	GISAID	Asia	India	2020-09-10
EPI_ISL_577648	GISAID	Asia	India	2020-09-14
EPI_ISL_577679	GISAID	Asia	India	2020-09-28
EPI_ISL_577684	GISAID	Asia	India	2020-09-28
EPI_ISL_577690	GISAID	Asia	India	2020-09-28
EPI_ISL_577720	GISAID	Asia	India	2020-09-25
EPI_ISL_578080	GISAID	Asia	India	2020-09-10
EPI_ISL_578081	GISAID	Asia	India	2020-09-10
EPI_ISL_578179	GISAID	Asia	India	2020-09-10
EPI_ISL_578182	GISAID	Asia	India	2020-09-10
EPI_ISL_578184	GISAID	Asia	India	2020-09-10
MT459985	NCBI	Oceania	Guam	2020-03-26
MT459986	NCBI	Oceania	Guam	2020-03-24
MT459987	NCBI	Oceania	Guam	2020-03-20
MT007544	NCBI	Oceania	Australia	2020-01-25
MT641646	NCBI	Oceania	Australia	2020-02-21
MT641645	NCBI	Oceania	Australia	2020-02-21
MT641648	NCBI	Oceania	Australia	2020-02-24
MT450943	NCBI	Oceania	Australia	2020-03-10
MT451448	NCBI	Oceania	Australia	2020-03-24
MT451017	NCBI	Oceania	Australia	2020-03-18
MT450971	NCBI	Oceania	Australia	2020-03-12
MT451241	NCBI	Oceania	Australia	2020-03-20
MT450996	NCBI	Oceania	Australia	2020-03-15
MT450948	NCBI	Oceania	Australia	2020-03-10
MT450932	NCBI	Oceania	Australia	2020-03-07
MT450968	NCBI	Oceania	Australia	2020-03-12
MT451021	NCBI	Oceania	Australia	2020-03-18
MT450985	NCBI	Oceania	Australia	2020-03-14
MT451182	NCBI	Oceania	Australia	2020-03-22
MT450956	NCBI	Oceania	Australia	2020-03-11
MT450955	NCBI	Oceania	Australia	2020-03-11
MT450982	NCBI	Oceania	Australia	2020-03-13
MT451105	NCBI	Oceania	Australia	2020-03-19
MT451019	NCBI	Oceania	Australia	2020-03-18
MT451004	NCBI	Oceania	Australia	2020-03-16
MT450935	NCBI	Oceania	Australia	2020-03-08
MT451024	NCBI	Oceania	Australia	2020-03-18
MT451114	NCBI	Oceania	Australia	2020-03-20
MT451209	NCBI	Oceania	Australia	2020-03-24
MT450981	NCBI	Oceania	Australia	2020-03-13
MT451447	NCBI	Oceania	Australia	2020-03-28
MT450949	NCBI	Oceania	Australia	2020-03-10
MT451375	NCBI	Oceania	Australia	2020-03-25
MT451186	NCBI	Oceania	Australia	2020-03-23
MT451007	NCBI	Oceania	Australia	2020-03-16
MT450980	NCBI	Oceania	Australia	2020-03-13
MT450973	NCBI	Oceania	Australia	2020-03-12
MT450974	NCBI	Oceania	Australia	2020-03-13
MT451229	NCBI	Oceania	Australia	2020-03-20
MT451258	NCBI	Oceania	Australia	2020-03-22
MT451187	NCBI	Oceania	Australia	2020-03-23
MT451173	NCBI	Oceania	Australia	2020-03-22
MT451033	NCBI	Oceania	Australia	2020-03-20
MT451131	NCBI	Oceania	Australia	2020-03-21
MT451667	NCBI	Oceania	Australia	2020-03-30
MT451148	NCBI	Oceania	Australia	2020-03-21
MT450957	NCBI	Oceania	Australia	2020-03-11
MT451130	NCBI	Oceania	Australia	2020-03-21
MT451176	NCBI	Oceania	Australia	2020-03-22
MT451123	NCBI	Oceania	Australia	2020-03-20
MT451218	NCBI	Oceania	Australia	2020-03-24
MT451233	NCBI	Oceania	Australia	2020-03-20
MT450936	NCBI	Oceania	Australia	2020-03-09
MT450938	NCBI	Oceania	Australia	2020-03-09
MT450962	NCBI	Oceania	Australia	2020-03-12
MT451119	NCBI	Oceania	Australia	2020-03-20
MT451049	NCBI	Oceania	Australia	2020-03-17
MT451104	NCBI	Oceania	Australia	2020-03-19
MT450998	NCBI	Oceania	Australia	2020-03-15
MT450992	NCBI	Oceania	Australia	2020-03-14
MT450951	NCBI	Oceania	Australia	2020-03-10
MT450990	NCBI	Oceania	Australia	2020-03-14
MT451088	NCBI	Oceania	Australia	2020-03-19
MT451220	NCBI	Oceania	Australia	2020-03-17
MT451219	NCBI	Oceania	Australia	2020-03-17
MT450941	NCBI	Oceania	Australia	2020-03-10
MT451006	NCBI	Oceania	Australia	2020-03-16
MT451185	NCBI	Oceania	Australia	2020-03-23
MT451059	NCBI	Oceania	Australia	2020-03-17
MT451264	NCBI	Oceania	Australia	2020-03-22
MT451156	NCBI	Oceania	Australia	2020-03-21
MT451062	NCBI	Oceania	Australia	2020-03-18
MT451015	NCBI	Oceania	Australia	2020-03-17
MT451238	NCBI	Oceania	Australia	2020-03-20
MT451239	NCBI	Oceania	Australia	2020-03-20
MT451098	NCBI	Oceania	Australia	2020-03-19
MT451103	NCBI	Oceania	Australia	2020-03-19
MT451641	NCBI	Oceania	Australia	2020-03-26
MT451154	NCBI	Oceania	Australia	2020-03-21
MT451236	NCBI	Oceania	Australia	2020-03-20
MT451145	NCBI	Oceania	Australia	2020-03-21
MT451143	NCBI	Oceania	Australia	2020-03-21
MT451087	NCBI	Oceania	Australia	2020-03-19
MT451157	NCBI	Oceania	Australia	2020-03-21
MT451142	NCBI	Oceania	Australia	2020-03-21
MT451037	NCBI	Oceania	Australia	2020-03-21
MT451213	NCBI	Oceania	Australia	2020-03-24
MT451102	NCBI	Oceania	Australia	2020-03-19
MT451248	NCBI	Oceania	Australia	2020-03-21
MT451181	NCBI	Oceania	Australia	2020-03-22
MT450946	NCBI	Oceania	Australia	2020-03-10
MT451134	NCBI	Oceania	Australia	2020-03-21
MT451184	NCBI	Oceania	Australia	2020-03-23
MT451675	NCBI	Oceania	Australia	2020-03-31
MT451175	NCBI	Oceania	Australia	2020-03-22
MT450965	NCBI	Oceania	Australia	2020-03-12
MT451150	NCBI	Oceania	Australia	2020-03-21
MT451052	NCBI	Oceania	Australia	2020-03-17
MT451108	NCBI	Oceania	Australia	2020-03-19
MT451195	NCBI	Oceania	Australia	2020-03-23
MT451174	NCBI	Oceania	Australia	2020-03-22
MT451668	NCBI	Oceania	Australia	2020-03-30
MT451210	NCBI	Oceania	Australia	2020-03-24
MT451212	NCBI	Oceania	Australia	2020-03-24
MT451183	NCBI	Oceania	Australia	2020-03-22
MT451215	NCBI	Oceania	Australia	2020-03-24
MT451674	NCBI	Oceania	Australia	2020-03-31
MT451211	NCBI	Oceania	Australia	2020-03-24
MT451118	NCBI	Oceania	Australia	2020-03-20
MT451124	NCBI	Oceania	Australia	2020-03-20
MT451162	NCBI	Oceania	Australia	2020-03-22
MT451171	NCBI	Oceania	Australia	2020-03-22
MT451177	NCBI	Oceania	Australia	2020-03-22
MT451058	NCBI	Oceania	Australia	2020-03-17
MT451041	NCBI	Oceania	Australia	2020-03-22
MT450977	NCBI	Oceania	Australia	2020-03-13
MT451178	NCBI	Oceania	Australia	2020-03-22
MT451167	NCBI	Oceania	Australia	2020-03-22
MT451166	NCBI	Oceania	Australia	2020-03-22
MT451002	NCBI	Oceania	Australia	2020-03-15
MT451040	NCBI	Oceania	Australia	2020-03-22
MT451077	NCBI	Oceania	Australia	2020-03-18
MT451180	NCBI	Oceania	Australia	2020-03-22
MT451179	NCBI	Oceania	Australia	2020-03-22
MT451128	NCBI	Oceania	Australia	2020-03-20
MT451253	NCBI	Oceania	Australia	2020-03-22
MT451066	NCBI	Oceania	Australia	2020-03-18
MT451035	NCBI	Oceania	Australia	2020-03-20
MT451149	NCBI	Oceania	Australia	2020-03-21
MT451470	NCBI	Oceania	Australia	2020-03-27
MT451165	NCBI	Oceania	Australia	2020-03-22
MT451207	NCBI	Oceania	Australia	2020-03-24
MT451047	NCBI	Oceania	Australia	2020-03-16
MT451188	NCBI	Oceania	Australia	2020-03-23
MT451146	NCBI	Oceania	Australia	2020-03-21
MT451101	NCBI	Oceania	Australia	2020-03-19
MT451093	NCBI	Oceania	Australia	2020-03-19
MT451039	NCBI	Oceania	Australia	2020-03-22
MT451216	NCBI	Oceania	Australia	2020-03-24
MT451244	NCBI	Oceania	Australia	2020-03-21
MT451441	NCBI	Oceania	Australia	2020-03-29
MT451092	NCBI	Oceania	Australia	2020-03-19
MT451136	NCBI	Oceania	Australia	2020-03-21
MT451201	NCBI	Oceania	Australia	2020-03-23
MT451225	NCBI	Oceania	Australia	2020-03-19
[truncated: 214 more rows]
